# Supplementary material for: FABM-PCLake – linking aquatic ecology with hydrodynamics
Source: Copernicus journal article supplement (doi:10.5194/gmd-2015-260), 2016-02-03
Supplement: Supplementary file 1 [file gmd-2015-260-supplement.zip]

## Table of Contents

|                                                                                               |            |
|-----------------------------------------------------------------------------------------------|------------|
| <b>S1. FABM-PCLake modules description.....</b>                                               | <b>S2</b>  |
| <b>S1.1 Abiotic processes in the water column .....</b>                                       | <b>S3</b>  |
| <b>S1.2 Abiotic processes in the sediment .....</b>                                           | <b>S5</b>  |
| <b>S1.3 Phytoplankton in the water column .....</b>                                           | <b>S6</b>  |
| <b>S1.4 Phytoplankton in the sediment .....</b>                                               | <b>S9</b>  |
| <b>S1.5 Macrophytes.....</b>                                                                  | <b>S11</b> |
| <b>S1.6 Foodweb in the water column .....</b>                                                 | <b>S13</b> |
| <b>S1.7 Foodweb in sediment (zoobenthos) .....</b>                                            | <b>S16</b> |
| <b>S1.8 Auxiliary module .....</b>                                                            | <b>S18</b> |
| <b>S2. List of FABM-PCLake biogeochemical sink and source terms .....</b>                     | <b>S21</b> |
| <b>S 2.1 Abiotic water column module .....</b>                                                | <b>S21</b> |
| <b>S2.2 Abiotic sediment module.....</b>                                                      | <b>S24</b> |
| <b>S2.3 Phytoplankton water column module .....</b>                                           | <b>S26</b> |
| <b>S2.4 Phytoplankton sediment module.....</b>                                                | <b>S28</b> |
| <b>S2.5 Macrophytes module .....</b>                                                          | <b>S29</b> |
| <b>S2.6 Foodweb module in water column .....</b>                                              | <b>S30</b> |
| <b>S2.7 Foodweb module in the sediment .....</b>                                              | <b>S31</b> |
| <b>S3. FABM-PCLake parameter list (input file in .yaml format) in modular structure .....</b> | <b>S33</b> |
| <b>S3.1 FABM-PCLake_abiotic_water .....</b>                                                   | <b>S33</b> |
| <b>S3.2 FABM-PCLake_abiotic_sediment.....</b>                                                 | <b>S34</b> |
| <b>S3.3 FABM-PCLake_phytoplankton_water .....</b>                                             | <b>S36</b> |
| <b>S3.4 FABM-PCLake_phytoplankton_sediment .....</b>                                          | <b>S39</b> |
| <b>S3.5 FABM-PCLake_macrophytes.....</b>                                                      | <b>S41</b> |
| <b>S3.6 FABM-PCLake_foodweb_water .....</b>                                                   | <b>S44</b> |
| <b>S3.7 FABM-PCLake_foodweb_sediment .....</b>                                                | <b>S48</b> |
| <b>S3.8 FABM-PCLake_auxiliary .....</b>                                                       | <b>S50</b> |
| <b>S4. References.....</b>                                                                    | <b>S54</b> |

## S1. FABM-PCLake modules description

FABM-PCLake consists of 8 individual modules, and a brief description of each module is provided here.

**Supplemental Table S1 Modules overview for FABM-PCLake**

| Module                     | Nr. State variables | Processes                                                                                                   |
|----------------------------|---------------------|-------------------------------------------------------------------------------------------------------------|
| abiotic_water.F90          | 14                  | nitrification,denitrification,mineralisation,O <sub>2</sub> dynamics in water column                        |
| abiotic_sediment.F90       | 9                   | diffussion,nitrification,denitrification,mineralisation,O <sub>2</sub> demand in sediment                   |
| phytoplankton_water.F90    | 9                   | production, nutrient uptake, respiration, excretion, mortality                                              |
| phytoplankton_sediment.F90 | 9                   | respiration, excretion, mortality                                                                           |
| macrophytes.F90            | 3                   | production, nutrient uptake, respiration, excretion, mortality, migration, seasonality forcing, germination |
| foodweb_water.F90          | 10                  | predation, consumption, migration, assimilation, respiration, excretion, mortality                          |
| foodweb_sediment.F90       | 3                   | predation, consumption, migration, assimilation, respiration, excretion, mortality                          |
| auxiliary.f90              | 0                   | resuspension, sedimentation, burial, conserved quantities, mass balance check                               |

Detailed module descriptions are listed below and adhere to this general structure:

- Module description: relevant to corresponding F90 file.
- List of variables

- List of local state variables

Local State variables: local state variables are state variables that are registered within this module and changed mainly in this module's processes

- List of diagnostic variables

Diagnostic variables are additional variables that can be output and analysed, and typically these will represent key system properties and provide a more in-depth understanding of the processes occurring in the modules.

- List of external dependencies

The external dependencies are the variables that are provided by other modules, either by the hydrodynamic models (physical drivers) or by other biogeochemical modules (and models) within FABM.

Additional information on the implementation of a biogeochemical model within FABM, e.g., defining state variables, diagnostic variables and external dependencies, is provided on the FABM website ([www.fabm.net/wiki](http://www.fabm.net/wiki)) under "Developing\_a\_new\_biogeochemical\_model".

### **S1.1 Abiotic processes in the water column**

**File name:** abiotic\_water.F90

**Module description:** The abiotic\_water module describes the state variables which are related to abiotic processes in the water column, including: inorganic matter (IM), organic matter (detritus), dissolved nutrients (ammonium, nitrate, phosphate and dissolved silica-dioxide), immobilized phosphorus (adsorbed phosphorus) and dissolved oxygen.

**List of variables (in following tables):**

**Supplemental Table S2 List of local state variables in abiotic water module**

| State variable | Description of state variables                      |
|----------------|-----------------------------------------------------|
| sDDIMW         | dry weight of inorg. matter in water column, mgDW/l |
| sDDetW         | dry weight of detritus in water column, mgDW/l      |
| sNDetW         | nitrogen in detritus in water column, mgN/l         |
| sPDetW         | phosphorus in detritus in water column,mgP/l        |
| sSiDetW        | silica in detritus in water column,mgSi/l           |
| sPO4W          | phosphate in water column,mgP/l                     |
| sPAIMW         | adsorbed phosphorus in water column,mgP/l           |
| sNH4W          | ammonium in water column,mgN/l                      |
| sNO3W          | nitrate in water column,mgN/l                       |
| sSiO2W         | dissolved silica in water column,mgSi/l             |
| sO2W           | oxygen in water column,mgO2/l                       |

**Supplemental Table S3 List of local diagnostic variables in abiotic water module**

| Diagnostic variable | Description of diagnostic variable                                                                                        |
|---------------------|---------------------------------------------------------------------------------------------------------------------------|
| afO2SatW            | $afO2SatW = O2\text{-concentration} / \text{saturation } O2\text{-concentration} * 100$ , oxygen saturation percentage, % |
| rNDDetW             | $rNDDetW = sNDetW / sDDetW$ , N/D ratio of detritus in water ,gN/gD                                                       |
| rPDDetW             | $rPDDetW = sPDetW / sDDetW$ , P/D ratio of detritus in water, gP/gD                                                       |
| extIM               | $extIM = sDIMW * cExtSpIM$ , extinction factor caused by inorganic matter, -                                              |
| extDet              | $extDet = sDDetW * cExtSpDet$ , extinction factor caused by organic matter,-                                              |
| tO2Aer              | oxygen reaeration rate, mg/l/day                                                                                          |

**Supplemental Table S4 List of dependencies in abiotic water column module**

| <b>dependencies</b> | <b>Description</b> | <b>Linked external module</b> | <b>Linked external variable</b> |
|---------------------|--------------------|-------------------------------|---------------------------------|
| uTm                 | temperature        | physical driver               | temperature                     |
| uVWind              | wind speed         | physical driver               | wind_speed                      |

**S1.2 Abiotic processes in the sediment**

**File name:** abiotic\_sediment.F90

**Module description:** The abiotic\_sediment module describes all the state variables which are related to abiotic processes in the sediment, including: inorganic matter (IM), organic matter (detritus), dissolved nutrients (ammonium, nitrate, and phosphate), immobilized phosphorus (adsorbed phosphorus) and humus.

**List of variables (in following tables):**

**Supplemental Table S5 List of local state variables in abiotic sediment module**

| <b>State variable</b> | <b>Description of state variables</b>            |
|-----------------------|--------------------------------------------------|
| sDDIMS                | dry weight of inorg. matter in sediment,gDW/m**2 |
| sDDetS                | dry weight of detritus in sediment,gDW/m**2      |
| sNDetS                | nitrogen in detritus in sediment,gN/m**2         |
| sPDetS                | phosphorus in detritus in sediment,gP/m**2       |
| sSiDetS               | silica in detritus in sediment,gSi/m**2          |
| sPO4S                 | phosphate in sediment,gP/m**2                    |
| sPAIMS                | adsorbed phosphorus in sediment,gP/**2           |
| sNH4S                 | ammonium in sediment, gN/**2                     |
| sNO3S                 | nitrate in sediment,gN/m**2                      |
| sDHumS                | dry weight of humus in sediment, gDW/m**2        |
| sNHumS                | nitrogen of humus in sediment, gN/m**2           |
| sPHumS                | phosphorus of humus in sediment, gP/m**2         |

**Supplemental Table S6 List of local diagnostic variables in abiotic water module**

| diagnostic variable | Description of diagnostic variable                                      |
|---------------------|-------------------------------------------------------------------------|
| afOxySed            | $afOxySed = aDepthOxySed / cDepthS$ , proportion aerobic sediment, -    |
| rNDDetS             | $rNDDetS = sNDetS / sDDetS$ , N content of sediment detritus, gN/gDW    |
| rPDDetS             | $rPDDetS = sPDetS / sDDetS$ , P content of sediment detritus, gP/gDW    |
| aPEqIMS             | $aPEqIMS = aPIsoAdsS * sDIMS$ , equilibrium amount in sediment ,gP/m**2 |

**Supplemental Table S7 List of dependencies in abiotic sediment module**

| dependencies | Description             | Linked external module | Linked external variable |
|--------------|-------------------------|------------------------|--------------------------|
| uTm          | temperature             | physical driver        | temperature              |
| SWNH4        | ammonium_pool_in_water  | abiotic_water          | sNH4W                    |
| SWNO3        | nitrate_pool_in_water   | abiotic_water          | sNO3W                    |
| SWPO4        | phosphate_pool_in_water | abiotic_water          | sPO4W                    |
| SWSiO2       | siO2_release_to_water   | abiotic_water          | sSiO2W                   |
| O2Supply     | oxygen_pool             | abiotic_water          | sO2W                     |

**S1.3 Phytoplankton in the water column**

**File name:** phytoplankton\_water.F90

**Module description:** The phytoplankton\_water module describes the processes related to phytoplankton in the water column. Three groups of phytoplankton are described here: diatoms, green algae and cyanobacteria (blue-green algae). Each group is described in three elements, dry weight, nitrogen and phosphorus. The silica concentration in diatoms is

not a state variables here but instead defined as a diagnostic variable, since the model assumes that diatoms have a fixed Si/DW ratio, i.e., 0.1.

**List of variables (in following tables):**

**Supplemental Table S8 List of local state variables in phytoplankton water module**

| State variable | Description of state variables                       |
|----------------|------------------------------------------------------|
| sDDiatW        | diatom concentration in dry weight,mgDW/l            |
| sPDiatW        | diatom concentration in phosphorus,mgP/l             |
| sNDiatW        | diatom concentration in nitrogen,mgN/l               |
| sDGrenW        | green algae concentration in dry weight, mgDW/l      |
| sPGrenW        | green algae concentration in phosphorus,mgP/l        |
| sNGrenW        | green algae concentration in nitrogen,mgN/l          |
| sDBlueW        | blue-green algae concentration in dry weight, mgDW/l |
| sPBlueW        | blue-green algae concentration in phosphorus,mgP/l   |
| sNBlueW        | blue-green algae concentration in nitrogen,mgN/l     |

**Supplemental Table S9 List of local diagnostic variables in phytoplankton water module**

| diagnostic variable | Description of diagnostic variable                                                     |
|---------------------|----------------------------------------------------------------------------------------|
| oChlaBlue           | blue-green algae chlorophyll-a concentration,ug/l                                      |
| aLLimBlue           | light limitation factor for blue-green algae,-                                         |
| aNutLimBlue         | nutrient limitation factor for blue-green algae                                        |
| extBlue             | $extBlue = sDBlueW * cExtSpIM$ ,light extinction factor caused by blue-green algae,m-1 |
| rNDBlueW            | $rNDBlueW = sNBlueW / sDBlueW$ , N content in blue-green algae,gN/gD                   |
| rPDBlueW            | $rPDBlueW = sPBlueW / sDBlueW$ , P content in blue-green algae,gP/gD                   |

| diagnostic variable | Description of diagnostic variable                                                                        |
|---------------------|-----------------------------------------------------------------------------------------------------------|
| oChlaGren           | green algae chlorophyll-a concentration,ug/l                                                              |
| aLLimGren           | light limitation factor for green algae,-                                                                 |
| aNutLimGren         | nutrient limitation factor for green algae,-                                                              |
| extGren             | $extGren = sDGrenW * cExtSpIM$ ,light extinction factor caused by green algae,m-1                         |
| rNDGrenW            | $rNDGreenW = sNGrenW / sDGrenW$ , N content in green algae, gN/gD                                         |
| rPDGrenW            | $rPDGreenW = sPGrenW / sDGrenW$ , P content in green algae, gP/gD                                         |
| oChlaDiat           | diatom chlorophyll-a concentration,ug/l                                                                   |
| aLLimDiat           | light limitation factor for diatoms,-                                                                     |
| aNutLimDiat         | nutrient limitation factor for diatoms,-                                                                  |
| extDiat             | $extDiat = sDDiatW * cExtSpIM$ ,light extinction factor caused by diatoms,m-1                             |
| rNDDiatW            | $rNDDiatW = sNDiatW / sDDiatW$ , N content in diatoms, gN/gDW                                             |
| rPDDiatW            | $rPDDiatW = sPDiatW / sDDiatW$ , P content in diatoms, gP/gDW                                             |
| oSiDiatW            | $oSiDiatW = sDDiatW * cSiDDiatW$ , diatom silica concentration, mgSi/l                                    |
| aDPhytW             | $aDPhytW = sDBlueW + sDGrenW + sDDiatW$ ,total algae biomass in the water column,mgDW/l                   |
| rNDPhytW            | $rNDPhytW = (sNBlueW + sNGrenW + sNDiatW) / aDPhytW$ , N content in phytoplankton in water column, gN/gDW |
| rPDPhytW            | $rPDPhytW = (sPBlueW + sPGrenW + sPDiatW) / aDPhytW$ , P content in phytoplankton in water column, gP/gDW |
| ParSurf             | surface photosynthetically active radiation, W/m**2                                                       |
| phypar              | local photosynthetically active radiation (layer center par), W/m**2                                      |
| phytoextinction     | local extinction factor used by phytoplankton light function, m-1                                         |
| wO2PrimW            | oxygen production by phytoplankton, mgO2/l/d                                                              |

**Supplemental Table S10 List of dependencies in phytoplankton water module**

| <b>dependencies</b> | <b>Description</b>                  | <b>Linked external module</b> | <b>Linked external variable</b>                              |
|---------------------|-------------------------------------|-------------------------------|--------------------------------------------------------------|
| uTm                 | Temperature                         | physical driver               | temperature                                                  |
| par                 | photosynthetically active radiation | physical driver               | downwelling_photosynthetic<br>_radiative_flux                |
| Dz                  | cell_thickness                      | physical driver               | cell_thickness                                               |
| extc                | attenuation coefficient             | physical driver               | attenuation_coefficient_of_p<br>hotosynthetic_radiative_flux |
| SiO2poolW           | SiO <sub>2</sub> _source_wat        | abiotic_water                 | sSiO2W                                                       |
| PO4poolW            | sPO4_source_wat                     | abiotic_water                 | sPO4W                                                        |
| NO3poolW            | sNO3_source_wat                     | abiotic_water                 | sNO3S                                                        |
| NH4poolW            | sNH4_source_wat                     | abiotic_water                 | sNH4W                                                        |
| O2poolW             | oxygen_pool                         | abiotic_water                 | sO2W                                                         |
| DDetpoolW           | detritus_DW_pool_wat                | abiotic_water                 | sDDetW                                                       |
| NDetpoolW           | detritus_N_pool_wat                 | abiotic_water                 | sNDetW                                                       |
| PDetpoolW           | detritus_P_pool_wat                 | abiotic_water                 | sPDetW                                                       |
| SiDetpoolW          | detritus_Si_pool_wat                | abiotic_water                 | sSiDetW                                                      |

**S1.4 Phytoplankton in the sediment**

**File name:** phytoplankton\_sediment.F90

**Module description:** The phytoplankton\_sediment module describes the processes related to the phytoplankton which has settled to the bottom sediments. Three groups of phytoplankton are described here: diatoms, green algae and cyanobacteria (blue-green algae). Each group is described in three elements, dry weight, nitrogen and phosphorus. The silica concentration in diatom is not a state variables here but instead a diagnostic variable, since model assumes that diatoms have a fixed Si/DW ratio, i.e., 0.1

**List of variables (in following tables):**

**Supplemental Table S11 List of local state variables in phytoplankton sediment module**

| State variable | Description of state variables                        |
|----------------|-------------------------------------------------------|
| sDDiatS        | diatom concentration in dry weight,gDW/m**2           |
| sPDiatS        | diatom concentration in phosphorus,gP/m**2            |
| sNDiatS        | diatom concentration in nitrogen,gN/m**2              |
| sDGrenS        | green algae concentration in dry weight,gDW/m**2      |
| sPGrenS        | green algae concentration in phosphorus,gP/m**2       |
| sNGrenS        | green algae concentration in nitrogen,gN/m**2         |
| sDBlueS        | blue-green algae concentration in dry weight,gDW/m**2 |
| sPBlueS        | blue-green algae concentration in phosphorus,gP/m**2  |
| sNBlueS        | blue-green algae concentration in nitrogen,gN/m**2    |

**Supplemental Table S12 List of local diagnostic variables in phytoplankton sediment module**

| Diagnostic variable | Description of diagnostic variable                                                                  |
|---------------------|-----------------------------------------------------------------------------------------------------|
| oSiDiatS            | sediment diatom concentration in silica, gSi/m**2                                                   |
| rNDPhytS            | $rNDPhytS = (sNBlueS + sNGrenS + sNDiatS) / aDPhytS$ , N content in phytoplankton in sediment,gN/gD |
| rPDPhytS            | $rPDPhytS = (sPBlueS + sPGrenS + sPDiatS) / aDPhytS$ , P content in phytoplankton in sediment,gP/gD |

**Supplemental Table S13 List of dependencies in the phytoplankton sediment module**

| <b>dependencie<br/>s</b> | <b>Description</b>           | <b>Linked external<br/>module</b> | <b>Linked external<br/>variable</b> |
|--------------------------|------------------------------|-----------------------------------|-------------------------------------|
| uTm                      | temperature                  | physical driver                   | temperature                         |
| PO4poolS                 | sPO4_source_sed              | abiotic_sediment                  | sPO4S                               |
| NO3poolS                 | sNO3_source_sed              | abiotic_sediment                  | sNO3S                               |
| NH4poolS                 | sNH4_source_sed              | abiotic_sediment                  | sNH4S                               |
| DDetpoolS                | detritus_DW_pool_sed         | abiotic_sediment                  | sDDetS                              |
| NDetpoolS                | detritus_N_pool_sed          | abiotic_sediment                  | sNDetS                              |
| PDetpoolS                | detritus_P_pool_sed          | abiotic_sediment                  | sPDetS                              |
| SiDetpoolS               | detritus_Si_pool_sed         | abiotic_sediment                  | sSiDetS                             |
| SiO2poolW                | SiO <sub>2</sub> _source_sed | abiotic_water                     | sSiO2W                              |

**S1.5 Macrophytes****File name:** macrophytes.F90

**Module description:** This module describes the submerged macrophytes group, and is implemented as a benthic module. The state variables include: sDVeg, sNVeg, sPVeg (vegetation mass in dry weight, nitrogen and phosphorus, respectively). The related processes are: assimilation (only for sDVeg), nutrient uptake (only for sNVeg and sPVeg), respiration (only for sDVeg), excretion (only for sNVeg and sPVeg), mortality and migration.

**List of variables (in following tables):****Supplemental Table S14 List of local state variables in macrophytes module**

| <b>State variable</b> | <b>Description of state variables</b>            |
|-----------------------|--------------------------------------------------|
| sDVeg                 | vegetation (shoots+roots) in dry weight,gDW/m**2 |
| sNVeg                 | vegetation (shoots+roots) in nitrogen,gN/m**2    |
| sPVeg                 | vegetation (shoots+roots) in phosphorus,gP/m**2  |

**Supplemental Table S15 List of local diagnostic variables in macrophytes module**

| <b>diagnostic variable</b> | <b>Description of diagnostic variable</b>                                 |
|----------------------------|---------------------------------------------------------------------------|
| aCovVeg                    | coverage of macrophytes, %                                                |
| aDSubVeg                   | submerged macrophytes in dry weight,gDW/m**2                              |
| aLPAR1Veg                  | photosynthetically active radiation at top of vegetation layer, W/m**2    |
| aLPAR2Veg                  | photosynthetically active radiation at bottom of vegetation layer, W/m**2 |
| aNutLimVeg                 | nutrient limitation function for macrophytes,-                            |
| aLLimVeg                   | light limitation function for macrophytes,-                               |
| macroextinction            | local extinction factor used by macrophytes light function, m-1           |

**Supplemental Table S16 List of dependencies in macrophytes module**

| <b>dependencies</b> | <b>Description</b>                     | <b>Linked external module</b> | <b>Linked external variable</b>                          |
|---------------------|----------------------------------------|-------------------------------|----------------------------------------------------------|
| uTm                 | temperature                            | physical driver               | temperature                                              |
| par                 | photosynthetically active radiation    | physical driver               | downwelling_photosynthetic_radiative_flux                |
| dz                  | cell_thickness                         | physical driver               | cell_thickness                                           |
| sDepthW             | water depth                            | physical driver               | bottom_depth                                             |
| extc                | attenuation coefficient                | physical driver               | attenuation_coefficient_of_photosynthetic_radiative_flux |
| day                 | number of days since start of the year | physical driver               | number_of_days_since_start_of_the                        |

| dependencie<br>s | Description                          | Linked external<br>module | Linked external<br>variable |
|------------------|--------------------------------------|---------------------------|-----------------------------|
|                  |                                      |                           | _year                       |
| NH4poolW         | uptake_target_Ammonium_<br>water     | abiotic_water             | sNH4W                       |
| NO3poolW         | uptake_target_Nitrate_water          | abiotic_water             | sNO3W                       |
| PO4poolW         | uptake_target_Phosphate_w<br>ater    | abiotic_water             | sPO4W                       |
| DDetpoolW        | detritus_DW_pool_water               | abiotic_water             | sDDetW                      |
| NDetpoolW        | detritus_N_pool_water                | abiotic_water             | sNDetW                      |
| PDetpoolW        | detritus_P_pool_water                | abiotic_water             | sPDetW                      |
| O2poolW          | oxygen_pool                          | abiotic_water             | sO2W                        |
| NH4poolS         | uptake_target_Ammonium_s<br>ediment  | abiotic_sediment          | sNH4S                       |
| NO3poolS         | uptake_target_Nitrate_sedim<br>ent   | abiotic_sediment          | sNO3S                       |
| PO4poolS         | uptake_target_Phosphate_s<br>ediment | abiotic_sediment          | sPO4S                       |
| DDetpoolS        | detritus_DW_pool_sediment            | abiotic_sediment          | sDDetS                      |
| NDetpoolS        | detritus_N_pool_sediment             | abiotic_sediment          | sNDetS                      |
| PDetpoolS        | detritus_P_pool_sediment             | abiotic_sediment          | sPDetS                      |
| afOxySed         | fraction_aerobic_sediment            | abiotic_sediment          | afOxySed                    |

## S1.6 Foodweb in the water column

**File name:** foodweb\_water.F90

**Module description:** The foodweb\_water module describes the pelagic biological state variables including zooplankton, zooplanktivorous and benthivorous fish (represented by juvenile and adults, respectively) and piscivorous fish. The local processes are:

Zooplankton: assimilation, respiration (only for sDZoo), excretion (only for sNZoo, sPZoo), mortality and consumption by juvenile fish.

Juvenile fish: migration, reproduction (fraction of adult fish biomass become juvenile fish), assimilation (predation on zooplankton), respiration (only for sDFiJv), excretion (only for PFiJv, sNFiJv), mortality, consumption by piscivorous fish and aging (part of the juvenile fish become adult fish)

Adult fish: migration, reproduction (fraction of adult fish biomass become juvenile fish), respiration (only for sDFiAd), excretion (only for sPFiAd and sNFiAd), mortality, consumption by piscivorous fish, and aging (part of juvenile fish become adult fish), (note: the assimilation of adult fish occurs in the benthic module, where adult fish predating the zoobenthos).

Piscivorous fish: migration, assimilation, respiration and mortality (piscivorous fish have fixed N/D and P/D ratio).

#### **List of variables (in following tables):**

**Supplemental Table S17 List of local state variables in foodweb water module**

| <b>State variable</b> | <b>Description of state variables</b>          |
|-----------------------|------------------------------------------------|
| sDZoo                 | zooplankton in water column, dry weight,mgDW/l |
| sPZoo                 | zooplankton in water column,phosphorus,mgP/l   |
| sNZoo                 | zooplankton in water column,nitrogen,mgN/l     |
| sDFiJv                | young fish in water,dry weight,mgDW/l          |
| sPFiJv                | young fish in water,phosphorus,mgP/l           |
| sNFiJv                | young fish in water,nitrogen,mgN/l             |
| sDFiAd                | adult fish in water, dry weight,mgDW/l         |
| sPFiAd                | adult fish in water, phosphorus,mgP/l          |
| sNFiAd                | adult fish in water, nitrogen,mgN/l            |
| sDPisc                | piscivorous fish in water, dry weight,mgDW/l   |

**Supplemental Table S18 List of local diagnostic variables in foodweb water module**

| <b>Diagnostic variable</b> | <b>Description of diagnostic variable</b> |
|----------------------------|-------------------------------------------|
| aNPisc                     | piscivorous fish in nitrogen, mgN/l       |
| aPPisc                     | piscivorous fish in phosphorus, mgP/l     |

**Supplemental Table S19 List of dependencies in foodweb water module**

| <b>dependencies</b> | <b>Description</b>                     | <b>Linked external module</b> | <b>Linked external variable</b>           |
|---------------------|----------------------------------------|-------------------------------|-------------------------------------------|
| uTm                 | temperature                            | physical driver               | temperature                               |
| par                 | photosynthetically active radiation    | physical driver               | downwelling_photosynthetic_radiative_flux |
| dz                  | cell_thickness                         | physical driver               | cell_thickness                            |
| day                 | number of days since start of the year | physical driver               | number_of_days_since_start_of_the_year    |
| DfoodDiat           | diatom_as_food_DW                      | phytoplankton_water           | sDDiatW                                   |
| NfoodDiat           | diatom_as_food_N                       | phytoplankton_water           | sNDiatW                                   |
| PfoodDiat           | diatom_as_food_P                       | phytoplankton_water           | sPDiatW                                   |
| DfoodGren           | green_as_food_DW                       | phytoplankton_water           | sDGrenW                                   |
| NfoodGren           | green_as_food_N                        | phytoplankton_water           | sNGrenW                                   |
| PfoodGren           | green_as_food_P                        | phytoplankton_water           | sPGrenW                                   |
| DfoodBlue           | blue_as_food_DW                        | phytoplankton_water           | sDBlueW                                   |
| NfoodBlue           | blue_as_food_N                         | phytoplankton_water           | sNBlueW                                   |
| PfoodBlue           | blue_as_food_P                         | phytoplankton_water           | sPBlueW                                   |
| DDetpoolW           | detritus_as_food_DW                    | abiotic_water                 | sDDetW                                    |
| NDetpoolW           | detritus_as_food_N                     | abiotic_water                 | sNDetW                                    |

| <b>dependencie<br/>s</b> | <b>Description</b>                        | <b>Linked external module</b> | <b>Linked external<br/>variable</b> |
|--------------------------|-------------------------------------------|-------------------------------|-------------------------------------|
| PDetpoolW                | detritus_as_food_P                        | abiotic_water                 | sPDetW                              |
| SiDetpoolW               | detritus_as_food_Si                       | abiotic_water                 | sSiDetW                             |
| DfoodBent                | benthos_as_food_DW                        | phytoplankton_sediment        | sDBent                              |
| NH4poolW                 | NH4_pool_for_web                          | abiotic_water                 | sNH4W                               |
| NO3poolW                 | NO3_pool_for_web                          | abiotic_water                 | sNO3W                               |
| PO4poolW                 | PO4_pool_for_web                          | abiotic_water                 | sPO4W                               |
| aDSubVeg                 | submerged_macrophytes                     | macrophytes                   | aDSubVeg                            |
| tDEnvFiAd                | environmental correction                  | foodweb_sediment              | tDEnvFiAd                           |
| aDSatFiAd                | Saturation concentration<br>of adult fish | foodweb_sediment              | aDSatFiAd                           |

### **S1.7 Foodweb in sediment (zoobenthos)**

**File name:** foodweb\_sediment.F90

**Module description:** The foodweb\_sediment module describes the state variables relating to zoobenthos, thus sDBent, sPBent and sNBent. Local processes include consumption, migration, assimilation, and respiration (only for sDBent), excretion (only for sNBent and sPBent) and mortality. This module also describes the process of benthivorous fish (adult fish) predating on zoobenthos.

**List of variables (in following tables):**

**Supplemental Table S20 List of local state variables in foodweb sediment module**

| <b>State variable</b> | <b>Description of state variables</b> |
|-----------------------|---------------------------------------|
| sDBent                | zoobenthos, in dry weight,gDW/m**2    |
| sPBent                | zoobenthos, in phosphorus,gP/m**2     |
| sNBent                | zoobenthos, in nitrogen,gN/m**2       |

**Supplemental Table S21 List of local diagnostic variables in foodweb sediment module**

| diagnostic variable | Description of diagnostic variable |
|---------------------|------------------------------------|
| None                |                                    |

**Supplemental Table S22 List of dependencies in foodweb sediment module**

| dependencie<br>s | Description         | Linked external module | Linked external<br>variable |
|------------------|---------------------|------------------------|-----------------------------|
| uTm              | temperature         | physical driver        | temperature                 |
| sDepthW          | water depth         | physical driver        | bottom_depth                |
| DDetpoolS        | detritus_as_food_DW | abiotic_sediment       | sDDetS                      |
| PDetpoolS        | detritus_as_food_P  | abiotic_sediment       | sPDetS                      |
| NDetpoolS        | detritus_as_food_N  | abiotic_sediment       | sNDetS                      |
| SiDetpoolS       | detritus_as_food_Si | abiotic_sediment       | sSiDetS                     |
| PO4poolS         | PO4_pool_web_sed    | abiotic_sediment       | sPO4S                       |
| NH4poolS         | NH4_pool_web_sed    | abiotic_sediment       | sNH4S                       |
| NO3poolS         | NO3_pool_web_sed    | abiotic_sediment       | sNO3S                       |
| DfoodDiatS       | diatom_as_food_DW   | phytoplankton_sediment | sDDiatS                     |
| PfoodDiatS       | diatom_as_food_P    | phytoplankton_sediment | sPDiatS                     |
| NfoodDiatS       | diatom_as_food_N    | phytoplankton_sediment | sNDiatS                     |
| DfoodGrenS       | green_as_food_DW    | phytoplankton_sediment | sDGrenS                     |
| PfoodGrenS       | green_as_food_P     | phytoplankton_sediment | sPGrenS                     |
| NfoodGrenS       | green_as_food_N     | phytoplankton_sediment | sNGrenS                     |
| DfoodBlueS       | blue_as_food_DW     | phytoplankton_sediment | sDBlueS                     |
| PfoodBlueS       | blue_as_food_P      | phytoplankton_sediment | sPBlueS                     |
| NfoodBlueS       | blue_as_food_N      | phytoplankton_sediment | sNBlueS                     |
| DAdFish          | adult_fish_DW       | foodweb_water          | sDFiAd                      |

| <b>dependencie<br/>s</b> | <b>Description</b>   | <b>Linked external module</b> | <b>Linked external<br/>variable</b> |
|--------------------------|----------------------|-------------------------------|-------------------------------------|
| NAdFish                  | adult_fish_N         | foodweb_water                 | sNFAd                               |
| PAdFish                  | adult_fish_P         | foodweb_water                 | sPFiJv                              |
| DJvFish                  | young_fish_DW        | foodweb_water                 | sDFiJv                              |
| aCovVeg                  | macrophytes_coverage | macrophytes                   | aCovVeg                             |

### **S1.8 Auxiliary module**

**File name:** auxiliary.F90

**Module description:** The auxiliary module is created for the purpose of computing resuspension and sedimentation, erosion and sediment burial processes (that influence several other modules).

**List of variables (in following tables):**

**Supplemental Table S23 List of dependencies in auxiliary module**

| <b>dependencie<br/>s</b> | <b>Description</b>               | <b>Linked external module</b> | <b>Linked external<br/>variable</b> |
|--------------------------|----------------------------------|-------------------------------|-------------------------------------|
| uTm                      | temperature                      | physical driver               | temperature                         |
| sDepthW                  | water depth                      | physical driver               | bottom_depth                        |
| SWNH4                    | ammonium pool in water<br>column | abiotic_water                 | sNH4W                               |
| SWNO3                    | nitrate_pool_in_water            | abiotic_water                 | sNO3W                               |
| SWPO4                    | phosphate_pool_in_water          | abiotic_water                 | sPO4W                               |
| SWPAIM                   | adsorbed_phosphorus_in_<br>water | abiotic_water                 | sPAIMW                              |
| SWDIM                    | inorg_pool_in_water              | abiotic_water                 | sIMW                                |
| SWSiO2                   | SiO2_release_to_water            | abiotic_water                 | sSiO2W                              |
| SWO2                     | oxygen_pool                      | abiotic_water                 | sO2W                                |

| <b>dependencie<br/>s</b> | <b>Description</b>      | <b>Linked external module</b> | <b>Linked external<br/>variable</b> |
|--------------------------|-------------------------|-------------------------------|-------------------------------------|
| SWDDet                   | detritus_DW_in_water    | abiotic_water                 | sDDetW                              |
| SWNDet                   | detritus_N_in_water     | abiotic_water                 | sNDetW                              |
| SWPDet                   | detritus_P_in_water     | abiotic_water                 | sPDetW                              |
| SWSiDet                  | detritus_Si_in_water    | abiotic_water                 | sSiDetW                             |
| SWDDiat                  | diatom_DW_in_water      | phytoplankton_water           | sDDiatW                             |
| SWNDiat                  | diatom_N_in_water       | phytoplankton_water           | sNDiatW                             |
| SWPDiat                  | diatom_P_in_water       | phytoplankton_water           | sPDiatW                             |
| SWDGren                  | green_DW_in_water       | phytoplankton_water           | sDGrenW                             |
| SWNGren                  | green_N_in_water        | phytoplankton_water           | sNGrenW                             |
| SWPGren                  | green_P_in_water        | phytoplankton_water           | sPGrenW                             |
| SWDBlue                  | blue_DW_in_water        | phytoplankton_water           | sDBlueW                             |
| SWNBlue                  | blue_N_in_water         | phytoplankton_water           | sNBlueW                             |
| SWPBlue                  | blue_P_in_water         | phytoplankton_water           | sPBlueW                             |
| WSDDiatS                 | diatom_DW_in_sediment   | phytoplankton_sediment        | sDDiatS                             |
| WSNDiatS                 | diatom_N_in_sediment    | phytoplankton_sediment        | sNDiatS                             |
| WSPDiatS                 | diatom_P_in_sediment    | phytoplankton_sediment        | sPDiatS                             |
| WSDGrenS                 | green_DW_in_sediment    | phytoplankton_sediment        | sDGrenS                             |
| WSNGrenS                 | green_N_in_sediment     | phytoplankton_sediment        | sNGrenS                             |
| WSPGrenS                 | green_P_in_sediment     | phytoplankton_sediment        | sPGrenS                             |
| WSDBlueS                 | blue_DW_in_sediment     | phytoplankton_sediment        | sDBlueS                             |
| WSNBlueS                 | blue_N_in_sediment      | phytoplankton_sediment        | sNBlueS                             |
| WSPBlueS                 | blue_P_in_sediment      | phytoplankton_sediment        | sPBlueS                             |
| DragVeg                  | vegetation_biomass      | macrophytes                   | sDVeg                               |
| TurbFish                 | adult_fish_biomass      | foodweb_water                 | aDFish                              |
| tDAbioDetS               | detritus_abiotic_update | abiotic_sedimentiment         | tDAbioDetS                          |

| <b>dependencie<br/>s</b> | <b>Description</b>       | <b>Linked external module</b> | <b>Linked external<br/>variable</b> |
|--------------------------|--------------------------|-------------------------------|-------------------------------------|
| tDAbioHumS               | humus_abiotic_update     | abiotic_sediment              |                                     |
| tDPrimDetS               | detritus_from_algae      | phytoplankton_sediment        | tDPrimDetS                          |
| tDWebDetS                | detritus_from_vegetation | foodweb_sediment              | tDWebDetS                           |
| tDBedDetS                | detritus_from_foodweb    | macrophytes                   | tDBedDetS                           |

## S2. List of FABM-PCLake biogeochemical sink and source terms

This section provides a full list of the derivatives (and the processes in these) for the state variables implemented in FABM-PCLake. In order to distinguish the processes' modular location, different symbols are introduced to mark the processes (adopted from (Janse 2005)), see table 2 for the symbols representing the various modules.

**Supplemental Table S24 Symbols of different FABM-PCLake module processes**

| Modules                | Module mark                                                      | Example                                                                           |
|------------------------|------------------------------------------------------------------|-----------------------------------------------------------------------------------|
| abiotic water          | ( )                                                              | (-wDMinDetW )                                                                     |
| abiotic sediment       | ( <u>  </u> )                                                    | ( <u>-tDMinDetS</u> )                                                             |
| phytoplankton water    | [ ]                                                              | [+ wDMortPhytW ]                                                                  |
| phytoplankton sediment | [ <u>  </u> ]                                                    | [ <u>+ tPMortPhytDetS</u> ]                                                       |
| macrophytes            | <u>&lt; &gt;</u>                                                 | <u>&lt;+ tDMortVegW&gt;</u>                                                       |
| food web water column  | { }                                                              | {-wDConsDetZoo}                                                                   |
| food web sediment      | { <u>  </u> }                                                    | { <u>- tDConsDetBent</u> }                                                        |
| auxiliary module       | <span style="border: 1px solid black; padding: 2px;">simp</span> | <span style="border: 1px solid black; padding: 2px;">- tDSetIM + tDResusIM</span> |

### S 2.1 Abiotic water column module

1) inorg. matter in water [mgD/l/s]

$$dDIMW = \text{span style="border: 1px solid black; padding: 2px;">- tDSetIM + tDResusIM+uDErosIMW}$$

$$= \text{span style="border: 1px solid black; padding: 2px;">- settling + resuspension+erosion}$$

2) detritus in water [mgD/l/s]

$$dDDetW = \boxed{-tDSetDet + tDResusDet} (-wDMinDetW) [+ wDMortPhytW] \leq + tDMortVegW > \{-wDConsDetZoo + wDEgesZoo + wDMortZoo + tDEgesFish + tDMortFishDet + tDEgesPisc + tDMortPiscDet\}$$

3) detritus in water [mgP/l/s]

$$dPDetW = \boxed{-tPSetDet + tPResusDet} (-wPMinDetW) [+ wPMortPhytDetW] \leq + tPMortVegDetW > \{-wPConsDetZoo + wPEgesZooDet + wPMortZooDet + tPEgesFishDet + tPMortFishDet + tPEgesPiscDet + tPMortPiscDet\}$$

4) detritus in water [mgN/l/s]

$$dNDetW = \boxed{-tNSetDet + tNResusDet} (-wNMinDetW) [+ wNMortPhytDetW] \leq + tNMortVegDetW > \{-wNConsDetZoo + wNEgesZooDet + wNMortZooDet + tNEgesFishDet + tNMortFishDet + tNEgesPiscDet + tNMortPiscDet\}$$

$$= \boxed{-\text{settling} + \text{resuspension}} (-\text{mineralisation}) [+ \text{algal mortality}] \leq + \text{part of macrophyte mortality in water} > \{-\text{zooplankton detritus consumption} + \text{zooplankton egestion and mortality} + \text{whitefish egestion and mortality} + \text{pred.fish egestion and mortality}\}$$

5) detritus [mgSi/ l/s]

$$dSiDetW = \boxed{-tSiSetDet + tSiResusDet} (-wSiMinDetW) [+ wSiMortDiatW] \{+ wSiConsDiatZoo\}$$

$$= \boxed{-\text{settling} + \text{resuspension}} (-\text{mineralisation}) [+ \text{diatoms mortality}] \{+ \text{zooplankton diatoms consumption}\}$$

6) PO<sub>4</sub> in water [mgP/l/s]

$$dPO_4W = (wPMinDetW - wPSorpIMW + tPDifPO_4) \boxed{+ tPResusPO_4} [-wPUptPhyt + wPExcrPhytW + wPMortPhytPO_4W] \leq - tPUptVegW + tPExcrVegW + tPMortVegPO_4W > \{+$$

$$\begin{aligned}
& wPE_{\text{ExcZoo}} + wPE_{\text{EgesZooPO}_4} + wPM_{\text{ortZooPO}_4} + tPE_{\text{ExcFiJv}} + tPE_{\text{ExcFiAd}} + \\
& tPE_{\text{EgesFishPO}_4} + tPM_{\text{ortFishPO}_4} + tPE_{\text{ExcPisc}} + tPE_{\text{EgesPiscPO}_4} + tPM_{\text{ortPiscPO}_4} \} \\
& = (\text{mineralisation} - \text{sorption} + \text{diffusion from sediment}) \boxed{+ \text{resuspension}} [- \text{algal uptake} + \\
& \text{algal excretion} + \text{part of algal mortality}] \leq - \text{macrophyte uptake from water} + \text{macrophyte} \\
& \text{excretion in water} + \text{part of macrophyte mortality} \geq \{ + \text{zooplankton excretion and part of} \\
& \text{egestion and mortality} + \text{whitefish excretion and part of egestion and mortality} + \text{pred.fish} \\
& \text{excretion and part of egestion and mortality} \}
\end{aligned}$$

7) adsorbed P in water [mgP/l/s]

$$\begin{aligned}
dPAIMW &= \boxed{tP_{\text{ResusAIM}} - tP_{\text{SetAIM}}} (+wP_{\text{SorpIMW}}) \\
&= \boxed{\text{resuspension} - \text{settling}} (+ \text{sorption})
\end{aligned}$$

8) ammonium in water [mgN/l/s]

$$\begin{aligned}
dNH_4W &= (wN_{\text{MinDetW}} - wN_{\text{NitrW}} - tN_{\text{DiffNH}_4}) \boxed{+ tN_{\text{ResusNH}_4}} [- wN_{\text{UptNH}_4\text{Phyt}} + \\
& wN_{\text{ExcPhytW}} + wN_{\text{MortPhytNH}_4W}] \leq - tN_{\text{UptNH}_4\text{VegW}} + tN_{\text{ExcVegW}} + tN_{\text{MortVegNH}_4W} \geq \\
& \{ + wN_{\text{ExcZoo}} + wN_{\text{EgesZooNH}_4} + wN_{\text{MortZooNH}_4} + tN_{\text{ExcFiJv}} + tN_{\text{ExcFiAd}} + \\
& tN_{\text{EgesFishNH}_4} + tN_{\text{MortFishNH}_4} + tN_{\text{ExcPisc}} + tN_{\text{EgesPiscNH}_4} + tN_{\text{MortPiscNH}_4} \} \\
& = (\text{mineralisation} - \text{nitrification in water} - \text{diffusion from sediment}) \boxed{+ \text{resuspension}} [- \text{algal} \\
& \text{uptake} + \text{algal excretion} + \text{part of algal mortality} - \text{macrophyte uptake from water}] \leq + \\
& \text{macrophyte excretion in water} + \text{part of macrophyte mortality} \geq \{ + \text{zooplankton excretion and} \\
& \text{part of egestion and mortality} + \text{whitefish excretion and part of egestion and mortality} + \\
& \text{pred.fish excretion and part of egestion and mortality} \}
\end{aligned}$$

9) nitrate in water [mgN/l/s]

$$\begin{aligned}
dNO_3W &= (wN_{\text{NitrW}} - wN_{\text{DenitW}} + tN_{\text{DiffNO}_3}) \boxed{+ tN_{\text{ResusNO}_3}} [- wN_{\text{UptNO}_3\text{Phyt}}] \leq - \\
& tN_{\text{UptNO}_3\text{VegW}} \geq
\end{aligned}$$

= (nitrification in water – denitrif. in water + diffusion from sediment)  $\boxed{+ \text{resuspension}}$  [- algal uptake] <- macrophyte uptake>.

10) oxygen in water [mgO<sub>2</sub>/l/s]

$dO_2W = (tO_2Aer - wO_2MinDetW - wO_2NitrW) (- tO_2MinDetS + tO_2NitrS) [+ wO_2ProdPhyt - wO_2RespPhytW + wO_2UptNO_3Phyt] \leq + tO_2ProdVegW - tO_2RespVegW + tO_2UptNO_3VegW >$

= (reaeration - mineralisation – nitrification) (- sediment oxygen demand) [+ algal production - algal respiration + nitrate uptake by algae] <+ macrophyte production - macrophyte respiration + nitrate uptake by macrophytes>

11) dissolved silicon dioxide in water [mgSi/ l/ s]

$dSiO_2W = (wSiMinDetW) (+ (1.0 - fRefrDetS) * tSiMinDetS) [- wSiUptDiat + wSiExcrDiatW] [+ tSiExcrDiatS]$

= (mineralisation in water) (+ mineralisation in sediment) [– diatoms uptake + diatoms excretion in water] [+ diatoms excretion in sed.]

## S2.2 Abiotic sediment module

12) sediment inorg. matter [gD/m<sup>2</sup>/s]

$dDIMS = \boxed{tDSetIM - tDResusIM - tDBurIM + uDErosIMS}$

=  $\boxed{\text{settling} - \text{resuspension} - \text{burial} + \text{erosion}}$

13) sediment detritus [gD/m<sup>2</sup>/s]

$dDDetS = \boxed{tDSetDet - tDResusDet - tDBurDet} (- tDMinDetS) [+ tDMortPhytS] \leq + tDMortVegS > \{- tDConsDetBent + tDEgesBent + tDMortBent\}$

14) sediment detritus P [gP/m<sup>2</sup>/s]

$$dPDetS = \boxed{tPSetDet - tPResusDet - tPBurDet} (- tPMinDetS) [+ tPMortPhytDetS] <+ tPMortVegDetS> \{- tPConsDetBent + tPEgesBent + tPMortBent\}$$

15) sediment detritus N [gN/m<sup>2</sup>/s]

$$dNDetS = \boxed{tNSetDet - tNResusDet - tNBurDet} (- tNMinDetS) [+ tNMortPhytDetS] <+ tNMortVegDetS> \{- tNConsDetBent + tNEgesBent + tNMortBent\}$$

$$= \boxed{\text{settling} - \text{resuspension} - \text{burial}} (- \text{mineralisation}) [+ \text{sed. algal mortality}] <+ \text{macrophyte mortality in sed}> \{- \text{zoobenthos detritus consumption} + \text{zoobenthos egestion and mortality}\}$$

16) sediment detritus Si [gSi/m<sup>2</sup>/s]

$$dSiDetS = \boxed{tSiSetDet - tSiResusDet - tSiBurDet} (- tSiMinDetS) [+ tSiMortDiatS] \{+ tSiConsDiatBent\}$$

$$= \boxed{\text{settling} - \text{resuspension} - \text{burial}} (- \text{mineralisation}) [+ \text{sed. diatoms mortality}] \{- \text{zoobenthos diatoms consumption}\}$$

17) phosphate in pore water [gP/m<sup>2</sup>/s]

$$dPO4S = \boxed{tPMinDetS * (1.0 - fRefrDetS) - tPSorpIMS - tPDifPO4 - tPChemPO4} \boxed{tPResusPO4 - tPBurPO4} [+ tPExcrPhytS + tPMortPhytPO4S] <- tPUptVegS + tPExcrVegS + tPMortVegPO4S> \{+ tPExcrBent + tPEgesBentPO4 + tPMortBentPO4\}$$

$$= ( \text{detritus and humus mineralisation} - \text{sorption} - \text{diffusion to/from water} - \text{immobilisation} ) \boxed{- \text{resuspension} - \text{burial}} [+ \text{excretion and part of mortality of sed. algae}] <- \text{macrophyte uptake from sediment} + \text{macrophyte excretion in sediment} + \text{part of macrophyte mortality}> \{+ \text{excretion and part of egestion and mortality of zoobenthos}\}$$

18) adsorbed P in sediment [gP/m<sup>2</sup>/s]

$$dPAIMS = \boxed{tPSetAIM - tPResusAIM - tPBurAIM} (+ tPSorpIMS)$$

$$= ( \text{sorption} ) + \boxed{\text{settling} - \text{resuspension} - \text{burial}}$$

19) pore water ammonium [gN/m<sup>2</sup>/s]

$$dNH_4S = (tNMinDetS * (1.0 - fRefrDetS) - tNDifNH_4 - tNNitrS) - tNResusNH_4 - tNBurNH_4 \{ + tNExcrPhytS + tNMortPhytNH_4S - tNUptNH_4VegS \} < + tNExcrVegS + tNMortVegNH_4S > \{ + tNExcrBent + tNEgesBentNH_4 + tNMortBentNH_4 \}$$

$$= (\text{detritus and humus mineralisation} - \text{diffusion to/from water-nitrification in sediment}) - \text{resuspension} - \text{burial} \{ + \text{excretion and part of mortality of sed. algae} \} < - \text{macrophyte uptake from sediment} + \text{macrophyte excretion in sediment} + \text{part of macrophyte mortality} > \{ + \text{excretion and part of egestion and mortality of zoobenthos} \}$$

20) pore water nitrate [gN/m<sup>2</sup>/s]

$$dNO_3S = (tNNitrS - tNDenitS - tNDifNO_3) - tNResusNO_3 - tNBurNO_3 < - tNUptNO_3VegS >$$

$$= (\text{nitrification in sed.} - \text{denitrification in sed.} - \text{diffusion to/from water}) - \text{resuspension} - \text{burial} < - \text{macrophyte uptake from sediment} >$$

21) Sediment humus [gD /m<sup>2</sup> /s]

$$dDHumS = (uDErosOM - tDBurHum) (+ fRefrDetS * tDMinDetS - tDMinHumS)$$

22) Sediment humus [gN /m<sup>2</sup> /s]

$$dNHumS = (uNErosOM - tNBurHum) + (fRefrDetS * tNMinDetS - tNMinHumS)$$

23) Sediment humus [gP /m<sup>2</sup> /s]

$$dPHumS = (uPErosOM - tPBurHum) (+ fRefrDetS * tPMinDetS - tPMinHumS)$$

$$= (\text{erosion} - \text{burial}) (+ \text{humification} - \text{mineralisation})$$

## S2.3 Phytoplankton water column module

24) diatom dry weight in water column [mgD/l/s]

$$dDDiatW = [wDAssDiat - wDRespDiatW - wDMortDiatW] \boxed{- tDSetDiat + tDResusDiat} \{- wDConsDiatZoo\}$$

25) green algae dry weight in water column [mgD/l /s]

$$dDGrenW = [wDAssGren - wDRespGrenW - wDMortGrenW] \boxed{- tDSetGren + tDResusGren} \{- wDConsGrenZoo\}$$

26) cyanobacteria (blue-green algae) dry weight in water column [mgD/l /s]

$$dDBlueW = [wDAssBlue - wDRespBlueW - wDMortBlueW] \boxed{- tDSetBlue + tDResusBlue} \{- wDConsBlueZoo\}$$
$$= [\text{production} - \text{respiration} - \text{mortality}] \boxed{- \text{settling} + \text{resuspension}} \{- \text{grazing}\}$$

27) diatom P in water column [mgP/l /s]

$$dPDiatW = [wPUptDiat - wPExcrDiatW - wPMortDiatW] \boxed{- tPSetDiat + tPResusDiat} - wPConsDiatZoo\}$$

28) green algae P in water column [mgP/l /s]

$$dPGrenW = [wPUptGren - wPExcrGrenW - wPMortGrenW] \boxed{- tPSetGren + tPResusGren} \{- wPConsGrenZoo\}$$

29) cyanobacteria (blue-green algae) P in water column [mgP/l /s]

$$dPBlueW = [wPUptBlue - wPExcrBlueW - wPMortBlueW] \boxed{- tPSetBlue + tPResusBlue} \{- wPConsBlueZoo\}$$
$$= [\text{uptake} - \text{excretion} - \text{mortality}] \boxed{- \text{settling} + \text{resuspension}} \{- \text{grazing}\}$$

30) diatom N in water column [mgN/l /s]

$$dNDiatW = [wNUptDiat - wNExcrDiatW - wNMortDiatW] - \boxed{tNSetDiat + tNResusDiat} \{-wNConsDiatZoo\}$$

31) green algae N in water column [mgN/l /s]

$$dNGrenW = [wNUptGren - wNExcrGrenW - wNMortGrenW] - \boxed{tNSetGren + tNResusGren} \{-wNConsGrenZoo\}$$

32) cyanobacteria (blue-green algae) N in water column [mgN/l /s]

$$dNBlueW = [wNUptBlue - wNExcrBlueW - wNMortBlueW] - \boxed{tNSetBlue + tNResusBlue} \{-wNConsBlueZoo\}$$

$$= [\text{uptake} - \text{excretion} - \text{mortality}] - \boxed{\text{settling} + \text{resuspension}} \{-\text{grazing}\}$$

## S2.4 Phytoplankton sediment module

33) sediment diatom dry weight [gD/m2/s]

$$dDDiatS = \boxed{tDSetDiat - tDResusDiat} [-tDMortDiatS - tDRespDiatS] \{-tDConsDiatBent\}$$

34) sediment green algae dry weight [gD/m2/s]

$$dDGrenS = \boxed{tDSetGren - tDResusGren} [-tDMortGrenS - tDRespGrenS] \{-tDConsGrenBent\}$$

35) sediment cyanobacteria (blue-green algae) dry weight [gD/m2/s]

$$dDBlueS = \boxed{tDSetBlue - tDResusBlue} [-tDMortBlueS - tDRespBlueS] \{-tDConsBlueBent\}$$

$$= \boxed{\text{settling} - \text{resuspension}} [-\text{mortality} - \text{respiration}] \{-\text{zoobenthos consumption}\}$$

36) sediment diatom phosphorus [gP/m2/s]

$$dPDiatS = \boxed{tPSetDiat - tPResusDiat} \boxed{[- tPMortDiatS - tPExcrDiatS] \{- tPConsDiatBent\}}$$

37) sediment green algae phosphorus [gP/m2/s]

$$dPGrenS = \boxed{tPSetGren - tPResusGren} \boxed{[- tPMortGrenS - tPExcrGrenS] \{- tPConsGrenBent\}}$$

38) sediment cyanobacteria (blue-green algae) phosphorus [gP/m2/s]

$$dPBlueS = \boxed{tPSetBlue - tPResusBlue} \boxed{[- tPMortBlueS - tPExcrBlueS] \{- tPConsBlueBent\}}$$

$$= \boxed{\text{settling} - \text{resuspension}} \boxed{[- \text{mortality} - \text{excretion}] \{- \text{zoobenthos consumption}\}}$$

39) sediment diatom nitrogen [gN/m2/s]

$$dNDiatS = \boxed{tNSetDiat - tNResusDiat} \boxed{[- tNMortDiatS - tNExcrDiatS] \{- tNConsDiatBent\}}$$

40) sediment green algae nitrogen [gN/m2/s]

$$dNGrenS = \boxed{tNSetGren - tNResusGren} \boxed{[- tNMortGrenS - tNExcrGrenS] \{- tNConsGrenBent\}}$$

41) sediment cyanobacteria (blue-green algae) nitrogen [gN/m2/s]

$$dNBlueS = tNSetBlue - tNResusBlue - tNMortBlueS - tNExcrBlueS - tNConsBlueBent$$

$$= \boxed{\text{settling} - \text{resuspension}} \boxed{[- \text{mortality} - \text{excretion}] \{- \text{zoobenthos consumption}\}}$$

## S2.5 Macrophytes module

42) macrophytes dry weight [gD/m2/s]

$$dDVeg = \boxed{< tDProdVeg - tDRespVeg - tDMortVeg + tDMigrVeg >}$$

$$= \boxed{< \text{production} - \text{respiration} - \text{mortality} + \text{migration} >}$$

43) macrophytes phosphorus [gP/m<sup>2</sup>/s]

$$\begin{aligned} dPVeg &= \underline{<tPUptVeg - tPExcrVeg - tPMortVeg + tPMigrVeg>} \\ &= \underline{<uptake - excretion - mortality + migration>} \end{aligned}$$

44) macrophytes nitrogen [gN/m<sup>2</sup>/s]

$$\begin{aligned} dNVeg &= \underline{<tNUptVeg - tNExcrVeg - tNMortVeg + tNMigrVeg>} \\ &= \underline{<uptake - excretion - mortality + migration>} \end{aligned}$$

## S2.6 Foodweb module in water column

45) zooplankton dry weight [mgD/l/s]

$$\begin{aligned} dDZoo &= \{wDAssZoo - wDRespZoo - wDMortZoo - tDConsFiJv\} \\ &= \{\text{assimilation} - \text{respiration} - \text{mortality} - \text{fish predation}\} \end{aligned}$$

46) zooplankton phosphorus [mgP/l/s]

$$\begin{aligned} dPZoo &= \{wPAssZoo - wPExcrZoo - wPMortZoo - tPConsFiJv\} \\ &= \{\text{assimilation} - \text{excretion} - \text{mortality} - \text{fish predation}\} \end{aligned}$$

47) zooplankton phosphorus [mgN/l/s]

$$\begin{aligned} dNZoo &= \{wNAssZoo - wNExcrZoo - wNMortZoo - tNConsFiJv\} \\ &= \{\text{assimilation} - \text{excretion} - \text{mortality} - \text{fish predation}\} \end{aligned}$$

48) juvenile whitefish dry weight [mgD/l/s]

$$\begin{aligned} dDFiJv &= \{tDMigrFiJv + tDReprFish - tDAgeFish + tDAssFiJv - tDRespFiJv - tDMortFiJv - \\ &tDConsFiJvPisc\} \end{aligned}$$

49) juvenile whitefish phosphorus [mgP/l/s]

$$dPFiJv = \{tPMigrFiJv + tPReprFish - tPAgeFish + tPAssFiJv - tPRespFiJv - tPMortFiJv - tPConsFiJvPisc\}$$

50) juvenile whitefish nitrogen [mgN/l/s]

$$dDFiJv = \{tDMigrFiJv + tDReprFish - tDAgeFish + tDAssFiJv - tDRespFiJv - tDMortFiJv - tDConsFiJvPisc\}$$

$$= \{migration + reproduction - ageing + assimilation - respiration - mortality - predation\}$$

51) adult whitefish dry weight[mgD/l/s]

$$dDFiAd = \{tDMigrFiAd - tDReprFish + tDAgeFish - tDRespFiAd - tDMortFiAd - tDConsFiAdPisc - tDHarvFish\} \{+ tDAssFiAd\}$$

52) adult whitefish phosphorus [mgP/l/s]

$$dPFiAd = \{tPMigrFiAd - tPReprFish + tPAgeFish - tPRespFiAd - tPMortFiAd - tPConsFiAdPisc\} \{+ tPAssFiAd\}$$

53) adult whitefish nitrogen [mgN/l/s]

$$dNFiAd = \{tNMigrFiAd - tNReprFish + tNAgeFish - tNRespFiAd - tNMortFiAd - tNConsFiAdPisc\} \{+ tNAssFiAd\}$$

$$= \{migration - reproduction + ageing - respiration - mortality - predation\} \{+ assimilation\}$$

54) piscivorous fish dry weight[mgD/l/s]

$$dDPisc = \{tDMigrPisc + tDAssPisc - tDRespPisc - tDMortPisc\}$$

$$= migration + assimilation - respiration - mortality \}$$

## S2.7 Foodweb module in the sediment

55) zoobenthos dry weight[gD/m2/s]

$$dDBent = \{tDMigrBent + tDAssBent - tDRespBent - tDMortBent - tDConsFiAd\}$$

56) zoobenthos phosphorus[gP/m2/s]

$$dPBent = \{tPMigrBent + tPAssBent - tPRespBent - tPMortBent - tPConsFiAd\}$$

57) zoobenthos nitrogen[gN/m2/s]

$$dNBent = \{tNMigrBent + tNAssBent - tNRespBent - tNMortBent - tNConsFiAd\}$$

$$= \{migration + assimilation - respiration - mortality - fish predation\}$$

### **S3. FABM-PCLake parameter list (input file in .yaml format) in modular structure**

The input file can be downloaded from [www.fabm.net](http://www.fabm.net) and use of the template provided here is recommended as a basis for parameter adaptation, as the yaml file format includes a strict indentation standard.

#### **S3.1 FABM-PCLake\_abiotic\_water**

**model:** pclake\_abiotic\_water

**long\_name:** abiotic\_process\_in\_water

**initialization:**

sNH4W: 0.1 # mgN/l, ammonium in water

sNO3W: 0.1 # mgN/l, nitrite in water

sPO4W: 0.01 #mgP/l, phosphate in water

sPAIMW: 0.0 # mgP/l, adsorbed phosphorus on inorg. matter in water

sSiO2W: 3.0 # mgSi/l, dissolved silicon dioxide in water

sO2W: 10.0 # mgO2/l, oxygen in water

sDIMW: 5.0 # mgDW/l, inorg.matter in water

sDDetW: 2.0 # mgDW/l, water detritus in dry weight

sPDetW: 0.005 # mgP/l, water detritus in phosphorus

sNDetW: 0.05 # mgN/l, water detritus in nitrogen

sSiDetW: 0.02 # mgSi/l, water detritus in silica

**parameters:**

cCPerDW: 0.4 # gC/gDW, C content of organic matter

cExtSpDet: 0.15 # m2/gDW,specific\_extinction\_detritus

cExtSpIM: 0.05 # 0.05m2/gDW specific\_extinction\_inert\_matter

cExtWat: 0.5 # background\_extinction"

cKPAdsOx: 0.6 # m3/gP, P adsorption affinity at oxidized conditions

cRelPAdsAl: 0.134 # gP/gAl, max. P adsorption per g Al

cRelPAdsD: 0.00003 # gP/gD, max. P adsorption per g DW

cRelPAdsFe: 0.065 # gP/gFe, max. P adsorption per g Fe  
 cThetaAer: 1.024 #  $1/e^{\theta C}$ , temperature coeff. for reaeration  
 cThetaMinW: 1.07 # exponential temperature constant of mineralisation in water  
 cThetaNitr: 1.08 # temperature coefficient for nitrification  
 fAlDIM: 0.01 # gAl/gD, Al content of inorg. matter  
 fFeDIM: 0.01 # gFe/gD, Fe content of inorg. matter  
 fRedMax: 0.9 # max. reduction factor of P adsorption affinity  
 hNO3Denit: 2 # mgN/l, quadratic half-sat. NO3 conc. for denitrification  
 hO2BOD: 1 # mgO2/l, half-sat. oxygen conc. for BOD  
 hO2Nitr: 2 # mgO2/l, half-sat. O2 conc. for nitrification in water  
 kDMinDetW: 0.01 # day<sup>-1</sup>, decomposition constant of detritus  
 kNitrW: 0.1 # day<sup>-1</sup>, nitrification rate constant in water  
 kPSorp: 0.05 # day<sup>-1</sup>, P sorption rate constant not too high -> model speed day  
 NO3PerC: 0.8 # mol NO3 denitrified per mol C mineralised  
 O2PerNH4: 2 # mol O2 used per mol NH4<sup>+</sup> nitrified  
**# Sinking**  
 cVSetIM: -1.0 # m/day, max. sedimentation velocity of inert org. matter  
 cVSetDet: -0.25 # m/day, max. sedimentation velocity of detritus

### **S3.2 FABM-PCLake\_abiotic\_sediment**

**model:** pclake\_abiotic\_sediment

**long\_name:** abiotic\_process\_in\_sediment

**initialization:**

sNH4S: 0.02 # gN/m<sup>2</sup>, dissolved N-NH4 in interstitial water  
 sNO3S: 0.002 # gN/m<sup>2</sup>, dissolved N-NO3 in interstitial water  
 sPO4S: 0.181703 # gP/m<sup>2</sup>, dissolved P-PO4 in interstitial water  
 sPAIMS: 17.9886 # gP/m<sup>2</sup>, adsorbed P in sediment  
 sDIMS: 32706.5 # gDW/m<sup>2</sup>; Inorg matter in sediment

sDDetS: 181.703 # gDW/m2, detritus in sediment  
 sNDetS: 4.54258 # gN/m2, detritus in sediment  
 sPDetS: 0.454258 # gP/m2, detritus in sediment  
 sSiDetS: 1.81703 # gSi/m2, detritus in sediment  
 sDHumS: 3452.36 # gDW/m2, humus in sediment,  
 sNHumS: 172.618 # gN/m2, humus in sediment, initial N fraction in humus  
 sPHumS: 17.2618 # gP/m2, humus in sediment, initial P fraction in humus

**parameters:**

bPorS: 0.847947 # porosity [m3 water m-3 sediment]  
 bPorCorS: 0.737275 # sediment porosity, corrected for tortuosity  
 cCPerDW: 0.4 # gC/gDW, C content of organic matter  
 cDepthS: 0.1 # sediment depth [m]  
 cKPAdsOx: 0.6 # m3/gP, P adsorption affinity at oxidized conditions  
 coPO4Max: 1.0 # mgP/l, max. PO4 conc. in pore water  
 cRelPAdsAl: 0.134 # gP/gAl, max. P adsorption per g Al  
 cRelPAdsD: 0.00003 # gP/gD, max. P adsorption per g DW  
 cRelPAdsFe: 0.065 # gP/gFe, max. P adsorption per g Fe  
 cThetaDif: 1.02 # Temperature coefficient for diffusion  
 cThetaMinS: 1.07 # -, exponential Temperature constant of sediment mineralisation  
 cThetaNitr: 1.08 # Temperature coefficient for nitrification  
 cTurbDifNut: 5.0 # bioturbation factor for diffusion  
 cTurbDifO2: 5.0 # -, bioturbation factor for diffusion  
 fAlDIM: 0.01 # gAl/gD, Al content of inorg. matter  
 fDepthDifS: 0.5 # nutrient diffusion distance as fraction of sediment depth  
 fFeDIM: 0.01 # gFe/gD, Fe content of inorg. matter  
 fRedMax: 0.9 # max. reduction factor of P adsorption affinity  
 fRefrDetS: 0.15 # -, refractory fraction of sed. detritus  
 hNO3Denit: 2.0 # mgN/l, quadratic half-sat. NO3 conc. for denitrification

kDMinDetS: 0.002 # "day-1, decomposition constant of sediment detritus  
kNDifNH4: 0.000112 # m2/day, mol. NH4 diffusion constant  
kNDifNO3: 0.000086 # m2/day, mol. NO3 diffusion constant  
kNitrS: 1.0 # day-1,nitrification rate constant in sediment  
kO2Dif: 0.000026 # m2/day, mol. O2 diffusion constant  
kPChemPO4: 0.03 # day-1, chem. PO4 loss rate  
kPDifPO4: 0.000072 # m2/day, mol. PO4 diffusion constant  
kPSorp: 0.05 # day-1, P sorption rate constant not too high -> model speed  
NO3PerC: 0.8 # mol NO3 denitrified per mol C mineralised  
O2PerNH4: 2.0 # mol O2 used per mol NH4+ nitrified  
kDMinHum: 0.00001 # day-1 ,maximum\_decomposition\_constant\_of\_humic\_material\_(1D-5)

**coupling:**

oxygen\_pool\_water: abiotic\_water/sO2W  
SiO2\_generated\_by\_mineralisation: abiotic\_water/sSiO2W  
NH4\_diffusion\_flux: abiotic\_water/sNH4W  
NO3\_diffusion\_flux: abiotic\_water/sNO3W  
PO4\_diffusion\_flux: abiotic\_water/sPO4W

**S3.3 FABM-PCLake\_phytoplankton\_water**

**model:** pclake\_phytoplankton\_water

**long\_name:** phytoplankton\_in\_water

**initialization:**

sDDiatW: 0.5 # diatoms\_DW\_in\_lake\_water  
sPDiatW: 0.005 # diatoms\_P\_in\_lake\_water  
sNDiatW: 0.05 # diatoms\_N\_in\_lake\_water  
sDGrenW: 0.5 # green\_algae\_DW\_in\_lake\_water  
sPGrenW: 0.005 # green\_algae\_P\_in\_lake\_water

sNGrenW: 0.05 # green\_algae\_N\_in\_lake\_water

sDBlueW: 3.0 # blue-greens\_DW\_in\_lake\_water

sPBlueW: 0.03 # blue-greens\_P\_in\_lake\_water

sNBlueW: 0.3 # blue-greens\_N\_in\_lake\_water

**parameters:**

cAffNUptBlue: 0.2 # l/mgDW/day, initial N uptake affinity bluegreens

cAffNUptDiat: 0.2 # l/mgDW/day, initial N uptake affinity diatoms

cAffNUptGren: 0.2 # l/mgDW/day, initial N uptake affinity greens:

cAffPUptBlue: 0.8 # l/mgDW/day, initial P uptake affinity bluegreens

cAffPUptDiat: 0.2 # l/mgDW/day, initial P uptake affinity diatoms

cAffPUptGren: 0.2 # l/mgDW/day, initial P uptake affinity greens

cChDBlueMax: 0.015 # mgChl/mgDW,max.\_chlorophyll/C\_ratio\_bluegreens

cChDBlueMin: 0.005 # mgChl/mgDW,min.\_chlorophyll/C\_ratio\_bluegreens

cChDDiatMax: 0.012 # mgChl/mgDW, max.\_chlorophyll/C\_ratio\_diatoms

cChDDiatMin: 0.004 # mgChl/mgDW ,min.\_chlorophyll/C\_ratio\_diatoms

cChDGrenMax: 0.02 # mgChl/mgDW,max.\_chlorophyll/C\_ratio\_greens

cChDGrenMin: 0.01 # mgChl/mgDW, min.\_chlorophyll/C\_ratio\_greens

cCPerDW: 0.4 # gC/gDW, C content of organic

cExtSpBlue : 0.35 #0.35m2/gDW,specific\_extinction\_bluegreens

cExtSpDiat : 0.25 # 0.25m2/gDW,specific\_extinction\_diatoms

cExtSpGren : 0.25 # 0.25m2/gDW,specific\_extinction\_greens

cLOptRefBlue: 13.6 # W/m2, optimum PAR for blue-greens at 20 °C (Steele function)

cLOptRefDiat: 54.0 # W/m2, optimum PAR for diatoms at 20 °C (Steele function)

cMuMaxBlue: 0.6 # day-1,maximum\_growth\_rate\_bluegreens'

cMuMaxDiat: 2.0 # day-1,maximum\_growth\_rate\_diatoms

cMuMaxGren: 1.5 # day-1,maximum\_growth\_rate\_greens

cNDBlueMax: 0.15 # mgN/mgDW, max. N/day ratio bluegreens

cNDBlueMin: 0.03 # mgN/mgDW, minimum N/day ratio bluegreens

cNDDiatMax: 0.05 # mgN/mgDW, max. N/day ratio diatoms  
cNDDiatMin: 0.01 # mgN/mgDW, minimum N/day ratio diatoms  
cNDGrenMax: 0.1 # mgN/mgDW, max. N/day ratio greens  
cNDGrenMin: 0.02 # mgN/mgDW, minimum N/day ratio greens  
cPDBlueMax: 0.025 # mgP/mgDW, max. P/day ratio blue-greens  
cPDBlueMin: 0.0025 # mgP/mgDW, minimum P/day ratio bluegreens  
cPDDiatMax: 0.005 # mgP/mgDW, max. P/day ratio diatoms  
cPDDiatMin: 0.0005 # mgP/mgDW, minimum P/day ratio diatoms  
cPDGrenMax: 0.015 # mgP/mgDW, max. P/day ratio greens  
cPDGrenMin: 0.0015 # mgP/mgDW, minimum P/day ratio greens  
cSiDDiat: 0.15 # mgSi/mgDW, Si/D ratio of diatoms  
cSigTmBlue: 12.0 # °C, temperature constant bluegreens (sigma in Gaussian curve)  
cSigTmDiat: 20.0 # °C, temperature constant diatoms (sigma in Gaussian curve)  
cSigTmGren: 15.0 # °C, temperature constant greens (sigma in Gaussian curve)  
cTmOptBlue: 25.0 # °C, optimum temperature bluegreens  
cTmOptDiat: 18.0 # °C, optimum temperature diatoms  
cTmOptGren: 25.0 # °C, optimum temperature of greens  
cVNUptMaxBlue: 0.07 # mgN/mgDW/day, maximum N uptake capacity of bluegreens  
cVNUptMaxDiat: 0.07 # mgN/mgDW/day, maximum N uptake capacity of diatoms  
cVNUptMaxGren: 0.07 # mgN/mgDW/day, maximum N uptake capacity of greens  
cVPUptMaxBlue: 0.04 # mgP/mgDW/day, maximum P uptake capacity of bluegreens  
cVPUptMaxDiat: 0.01 # mgP/mgDW/day, maximum P uptake capacity of diatoms  
cVPUptMaxGren: 0.01 # mgP/mgDW/day, maximum P uptake capacity of greens  
fDissMortPhyt: 0.2 # [-], soluble\_nutrient\_fraction\_of\_died\_  
hLRefGren: 17.0 # W/m2, half-sat. PAR for greens at 20 °C (Lehmann function)  
hO2BOD: 1.0 # mgO2/l, half-sat. oxygen conc. for BOD  
hSiAssBlue: 0.0 # mgSi/l, half-sat. Si conc. for growth of bluegreens: 0  
hSiAssDiat: 0.09 # mgSi/l, half-sat. Si for diatoms

hSiAssGren: 0.0 # mgSi/l, half-sat. Si conc. for growth of green algae: 0  
 kDRespBlue: 0.03 # day-1, maintenance respiration constant bluegreens (: 0.05 \* MuMax)  
 kDRespDiat: 0.1 # day-1, maintenance respiration constant diatoms (: 0.05 \* MuMax)  
 kDRespGren: 0.075 # day-1, maintenance respiration constant greens (: 0.05 \* MuMax)  
 kMortBlueW: 0.01 # day-1, mortality constant of bluegreens in water  
 kMortDiatW: 0.01 # day-1, mortality constant of diatoms in water  
 kMortGrenW: 0.01 # day-1, mortality constant of diatoms in water

#### **# sinking**

cVSetDiat: -0.5 # m/day, sedimentation velocity diatoms  
 cVSetGren: -0.2 # m/day, sedimentation velocity of greens  
 cVSetBlue: -0.06 # m/day, sedimentation velocity bluegreens

#### **coupling:**

SiO2\_pool\_water: abiotic\_water/sSiO2W  
 sPO4\_pool\_water: abiotic\_water/sPO4W  
 sNH4\_pool\_water: abiotic\_water/sNH4W  
 sNO3\_pool\_water: abiotic\_water/sNO3W  
 oxygen\_pool\_water: abiotic\_water/sO2W  
 detritus\_DW\_pool\_water: abiotic\_water/sDDetW  
 detritus\_N\_pool\_water: abiotic\_water/sNDetW  
 detritus\_P\_pool\_water: abiotic\_water/sPDetW  
 detritus\_Si\_pool\_water: abiotic\_water/sSiDetW  
 surface\_vegetation\_coverage: macrophytes/afCovSurfVeg

### **S3.4 FABM-PCLake\_phytoplankton\_sediment**

**model:** pclake\_phytoplankton\_sediment

**long\_name:** phytoplankton\_in\_sediment

#### **initialization:**

sDDiatS: 0.001 # diatoms\_DW\_on\_lake\_sediment

sPDiatS: 0.00001 # diatoms\_P\_on\_lake\_sediment  
 sNDiatS: 0.0001 # diatoms\_N\_on\_lake\_sediment  
 sDGrenS: 0.001 # green\_algae\_DW\_on\_lake\_sediment  
 sPGrenS: 0.00001 # green\_algae\_P\_on\_lake\_sediment  
 sNGrenS: 0.0001 # green\_algae\_N\_on\_lake\_sediment  
 sDBlueS: 0.001 # bluegreens\_DW\_on\_lake\_sediment  
 sPBlueS: 0.00001 # bluegreens\_P\_on\_lake\_sediment  
 sNBlueS: 0.0001 # bluegreens\_N\_on\_lake\_sediment

**parameters:**

cNDBlueMax: 0.15 # mgN/mgDW, max. N/day ratio bluegreens  
 cNDBlueMin: 0.03 # mgN/mgDW, minimum N/day ratio bluegreens  
 cNDDiatMax: 0.05 # mgN/mgDW, max. N/day ratio diatoms  
 cNDDiatMin: 0.01 # mgN/mgDW, minimum N/day ratio diatoms  
 cNDGrenMax: 0.1 # mgN/mgDW, max. N/day ratio greens  
 cNDGrenMin: 0.02 # mgN/mgDW, minimum N/day ratio greens  
 cPDBlueMax: 0.025 # mgP/mgDW, max. P/day ratio bluegreens  
 cPDBlueMin: 0.0025 # mgP/mgDW, minimum P/day ratio bluegreens  
 cPDDiatMax: 0.005 # mgP/mgDW, max. P/day ratio diatoms  
 cPDDiatMin: 0.0005 # mgP/mgDW, minimum P/day ratio diatoms  
 cPDGrenMax: 0.015 # mgP/mgDW, max. P/day ratio greens  
 cPDGrenMin: 0.0015 # mgP/mgDW, minimum P/day ratio greens  
 cSiDDiat: 0.15 # mgSi/mgDW, Si/D ratio of diatoms  
 cSigTmBlue: 12.0 # °C, temperature constant bluegreens (sigma in Gaussian curve)  
 cSigTmDiat: 20.0 # °C, temperature constant diatoms (sigma in Gaussian curve)  
 cSigTmGren: 15.0 # °C, temperature constant greens (sigma in Gaussian curve)  
 cTmOptBlue: 25.0 # °C, optimum temperature bluegreens  
 cTmOptDiat: 18.0 # °C, optimum temperature diatoms  
 cTmOptGren: 25.0 # °C, optimum temperature of greens

fDissMortPhyt: 0.2 # -, soluble nutrient fraction of dead algae

kDRespBlue: 0.03 # day-1, maintenance respiration constant gluegreens (: 0.05 \* MuMax)

kDRespDiat: 0.10 # day-1, maintenance respiration constant diatoms (: 0.05 \* MuMax)

kDRespGren: 0.075 # day-1, maintenance respiration constant greens (: 0.05 \* MuMax)

kMortBlueS: 0.2 # day-1, mortality constant bluegreens

kMortDiatS: 0.05 # day-1, mortality constant of sed. diatoms

kMortGrenS: 0.05 # day-1, mortality constant greens

#### **coupling:**

sPO4\_pool\_sediment: abiotic\_sediment/sPO4S

sNH4\_pool\_sediment: abiotic\_sediment/sNH4S

sNO3\_pool\_sediment: abiotic\_sediment/sNO3S

detritus\_DW\_pool\_sediment: abiotic\_sediment/sDDetS

detritus\_N\_pool\_sediment: abiotic\_sediment/sNDetS

detritus\_P\_pool\_sediment: abiotic\_sediment/sPDetS

detritus\_Si\_pool\_sediment: abiotic\_sediment/sSiDetS

SiO2\_pool\_water: abiotic\_water/sSiO2W

### **S3.5 FABM-PCLake\_macrophytes**

**model:** pclake\_macrophytes

**long\_name:** macrophytes

#### **initialization:**

sDVeg: 1.0 # vegetation\_DW\_in\_lake\_water

sNVeg: 0.02 # vegetation\_N\_in\_lake\_water

sPVeg: 0.002 # vegetation\_P\_in\_lake\_water

#### **parameters:**

bPorS: 0.847947 # porosity [m3 water m-3 sediment]

cAffNUptVeg: 0.2 # l/mgDW/day,initial\_N\_uptake\_affinity\_vegetation

cAffPUptVeg: 0.2 # l/mgDW/day,initial\_P\_uptake\_affinity\_vegetation

cCovSpVeg: 0.5      # %\_cover/gDW/m2      specific\_cover  
 cCPerDW: 0.4      # gC/gDW, C content of organic matte  
 cDayWinVeg: 259.0      # day, end of growing season: 16 Sep  
 cDCarrVeg: 400.0      # gDW/m2, max. vegetation standing crop  
 cDepthS: 0.1      # sediment depth [m]  
 cDLayerVeg: 0.0      # gD/m2, biomass of a single layer floating leaves  
 cDVegIn: 1.0      # gD/m2, external vegetation density  
 cExtSpVeg : 0.01      # 0.01 m2/gDW,specific\_extinction  
 cLengAllo: 15.0      # day, duration of allocation and reallocation phase  
 cLengMort: 15.0      # day, length of shoot mortality period  
 cMuMaxVeg: 0.2      # g/g shoot/day, maximum growth rate of vegetation at 20°C  
 cNDVeg0: 0.02      # gN/gD, initial N fraction in vegetation  
 cNDVegMax: 0.035      # mgN/mgD, maximum N/day ratio vegetation  
 cNDVegMin: 0.01      # mgN/mgD, minimum N/day ratio vegetation  
 cPDVeg0: 0.002      # gP/gD, initial P fraction in vegetation  
 cPDVegMax: 0.0035      # mgP/mgD, maximum P/day ratio vegetation  
 cPDVegMin: 0.0008      # mgP/mg, minimum P/day ratio vegetation  
 cQ10ProdVeg: 1.2      # temperature quotient of production  
 cQ10RespVeg: 2.0      # temperature quotient of respiration  
 cTmInitVeg: 9.0      # oC, temperature for initial growth  
 cVNUptMaxVeg: 0.1      # mgN/mgDW/day, maximum\_N\_uptake\_capacity\_of\_vegetation  
 cVPUptMaxVeg: 0.01      # mgP/mgDW/day ,maximum\_P\_uptake\_capacity\_of\_vegetation  
 fDepth1Veg: 0.5  
 #max.\_upper\_depth\_of\_submerged\_veget.\_layer,\_as\_fraction\_of\_water\_depth  
 fDepth2Veg: 1.0      #  
 max.\_lower\_depth\_of\_submerged\_veget.\_layer,\_as\_fraction\_of\_water\_depth  
 fDetWMortVeg: 0.1      # fraction\_of\_shoot\_mortality\_becoming\_water\_detritus  
 fDissMortVeg: 0.25      # fraction\_dissolved\_nutrients\_from\_died\_plants

fEmergVeg: 0.0      # g floating / g shoot, emergent fraction of shoot  
 fFloatVeg: 0.0      # g floating / g shoot, floating fraction of shoot  
 fRootVegSum: 0.1      # g root / g veg, root fraction outside growing season  
 fRootVegWin: 0.6      # g root / g veg, root fraction outside growing season  
 fSedUptVegCoef: 2.66 # sigm.\_regr.\_coeff.\_for\_sediment\_fraction\_of\_nutrient\_uptake  
 fSedUptVegExp : -0.83 #  
 exponent\_in\_sigm.\_regr.\_for\_sediment\_fraction\_of\_nutrient\_uptake  
 fSedUptVegMax: 0.998 # maximum\_sediment\_fraction\_of\_nutrient\_uptake  
 fWinVeg: 0.3      # fraction surviving in winter  
 hLRefVeg: 17.0      # W/m2 PAR, half-sat. light at 20°C  
 hO2BOD: 1.0      # mgO2/l, half-sat. oxygen conc. for BOD  
 kDRespVeg: 0.02      # day-1, dark respiration rate of vegetation  
 kMigrVeg: 0.001      # day-1, vegetation migration rate  
 kMortVegSum: 0.005      # day-1, vegetation mortality rate in Spring and Summer  
 UseEmpUpt: 0      # 0=do\_not\_use\_this\_empirical\_relation

### **coupling:**

ammonium\_pool\_water: abiotic\_water/sNH4W  
 nitrate\_pool\_water: abiotic\_water/sNO3W  
 phosphate\_pool\_water: abiotic\_water/sPO4W  
 ammonium\_pool\_sediment: abiotic\_sediment/sNH4S  
 nitrate\_pool\_sediment: abiotic\_sediment/sNO3S  
 phosphate\_pool\_sediment: abiotic\_sediment/sPO4S  
 oxygen\_pool\_water: abiotic\_water/sO2W  
 detritus\_DW\_pool\_water: abiotic\_water/sDDetW  
 detritus\_N\_pool\_water: abiotic\_water/sPDetW  
 detritus\_P\_pool\_water: abiotic\_water/sNDetW  
 detritus\_DW\_pool\_sediment: abiotic\_sediment/sDDetS  
 detritus\_N\_pool\_sediment: abiotic\_sediment/sNDetS

detritus\_P\_pool\_sediment: abiotic\_sediment/sPDetS

oxic\_layer\_value: abiotic\_sediment/afOxySed

### **S3.6 FABM-PCLake\_foodweb\_water**

**model:** pclake\_foodweb\_water

**long\_name:** foodweb\_components\_in\_water

#### **initialization:**

sDZoo: 0.05 # zooplankton\_DW\_in\_lake\_water

sPZoo: 0.0005 # zooplankton\_P\_in\_lake\_water

sNZoo: 0.0035 # zooplankton\_N\_in\_lake\_water

sDFiJv: 0.25 # young\_fish\_DW\_in\_lake\_water

sPFiJv: 0.0055 # young\_fish\_P\_in\_lake\_water

sNFiJv: 0.025 # young\_fish\_N\_in\_lake\_water

sDFiAd: 1.0 # adult\_fish\_DW\_in\_lake\_water

sPFiAd: 0.022 # adult\_fish\_P\_in\_lake\_water

sNFiAd: 0.1 # adult\_fish\_N\_in\_lake\_water

sDPisc: 0.005 # Predatory\_fish\_DW\_in\_lake\_water

#### **parameters:**

cCovVegMin: 40 # %,min.\_subm.veg.\_coverage\_for\_\_Pi\_sc

cDayReprFish: 120 # -, reproduction\_date\_of\_fish\_: \_1\_May

cDCarrFish: 15 # gDW/m2,carrying\_capacity\_of\_fish(: \_100\_gFW/m2,Grimm\_1983)

cDCarrPiscBare: 0.1 #

gDW/m2,carrying\_capacity\_of\_\_Pi\_sc\_for\_lake\_without\_marsh\_zone

cDCarrPiscMax: 1.2 # gDW/m2,maximum\_carrying\_capacity\_of\_\_Pi\_sc(: 75\_kg/ha)

cDCarrPiscMin: 0.1 # gDW/m2,minimun\_carrying\_capacity\_of\_\_Pi\_sc(: 6\_kg/ha)

cDCarrZoo: 25 # mg/l , carrying\_capacity\_of\_zooplankton

cDFiAdIn: 0.005 # gDW/m2,external\_fish\_density

cDFiJvIn: 0.005 # gDW/m2,external\_fish\_density

cDPHraMinPisc: 50 # gDW/m2,min.\_reed\_biomass\_for\_\_Pi\_sc  
cDPiscIn: 0.001 # gDW/m2,external\_\_Pi\_sc\_density  
cFiltMax: 4.5 # ltr/mgDW/day,maximum\_filtering\_rate(when\_DOMW: 0)  
cNDFishRef: 0.1 # mgN/mgDW,reference\_N/C\_ratio\_of\_Fish  
cNDPisc: 0.1 # mgN/mgDW ,reference\_N/C\_ratio\_of\_\_Pi\_sc ing  
cNDZooRef: 0.07 # mgN/mgDW,reference\_N/C-ratio\_herb.\_zooplankton  
cPDFishRef: 0.022 # mgP/mgDW , reference\_P/C\_ratio\_of\_Fish  
cPDPisc: 0.022 # mgP/mgDW, reference\_P/C\_ratio\_of\_\_Pi\_sc  
cPDZooRef: 0.01 # mgP/mgDW,reference\_P/C-ratio\_herb.\_zooplankton  
cPrefBlue: 0.125 # -,selection\_factor\_for\_bluegreens\_Cal.  
cPrefDet: 0.25 # -,selection\_factor\_for\_detritus  
cPrefDiat: 0.75 # -,selection\_factor\_for\_diatoms  
cPrefGren: 0.75 # -,selection\_factor\_for\_greens  
cRelPhraPisc: 0.075 # gDW/m2/%,rel.\_\_Pi\_sc\_density\_per\_%\_reed\_if\_subm.veg.  
cRelVegPisc: 0.03 #  
gDW/m2/%,extra\_rel.\_\_Pi\_sc\_density\_per\_%\_reed\_if\_\_aCovVeg\_\_>\_\_cCovVegMiN  
cSiDDiat: 0.15 # mgSi/mgDW Si/DW\_ratio\_of\_daitoms  
cSigTmFish: 10 # °C,temperature\_constant\_of\_fish(sigma\_in\_Gaussian\_curve)  
cSigTmPisc: 10 # °C,temperature\_constant\_of\_\_Pi\_sc(sigma\_in\_Gaussian\_curve)  
cSigTmZoo: 13 # °C,temperature\_constant\_zooplankton(sigma\_in\_Gaussian\_curve)  
cTmOptFish: 25 # °C,optimum\_temp.\_of\_fish  
cTmOptPisc: 25 # °C,optimum\_temp.\_of\_\_Pi\_sc  
cTmOptZoo: 25 # °C,optimum\_temp.\_zooplankton  
fAgeFish: 0.5 # -,yearly\_ageing\_fraction\_of\_young\_fish  
fDAssFiJv: 0.4 # -,C\_assimilation\_efficiency\_of\_young\_fish  
fDAssPisc: 0.4 # -, C\_ass.\_efficiency\_of\_\_Pi\_sc  
fDAssZoo: 0.35 # -,DW-assimilation\_efficiency\_of\_herb.\_zooplankton  
fDBone: 0.35 # -,fraction\_of\_fish\_C\_fixed\_in\_bones\_and\_scales

fDissEgesFish: 0.25 # -, soluble\_nutrient\_fraction\_of\_by\_fish\_egested\_food  
 fDissEgesPisc: 0.25 # -, soluble\_P\_fraction\_of\_by\_fish\_egested\_food  
 fDissEgesZoo: 0.25 # -,soluble\_nutrient\_fraction\_of\_by\_herb.zoopl.\_egested\_food  
 cVSetDiat: -0.5 # m/day, sedimentation velocity diatoms  
 fDissMortFish: 0.1 # -,soluble\_nutrient\_fraction\_of\_died\_fish(excl.\_bones\_and\_scales  
 fDissMortPisc: 0.1 # -,  
 soluble\_nutrient\_fraction\_of\_died\_\_Pi\_sc(excl.\_bones\_and\_scales  
 fDissMortZoo : 0.1 # -, soluble\_nutrient\_fraction\_of\_died\_zooplankton  
 fPBone: 0.5 # -, fraction\_of\_fish\_P\_fixed\_in\_bones\_and\_scales  
 fReprFish: 0.02 # -,yearly\_reproduction\_fraction\_of\_adult\_fish, divided by 86400 here  
 hDFishPisc: 1 # g/m2,half-saturating\_DFish\_for\_\_Pi\_sc\_predation  
 hDVegPisc: 5 # g/m2,half-sat.\_vegetation\_biomass\_for\_\_Pi\_sc\_growth  
 hDZooFiJv: 1.25 # g/m2, half-  
 saturating\_zooplankton\_biomass\_for\_young\_fish\_predation  
 hFilt: 1.0 # mgDW/l,half-sat.\_food\_conc.\_for\_filtering  
 kDAssFiJv: 0.12 # day-1,maximum\_assimilation\_rate\_of\_young\_fish  
 kDAssPisc: 0.025 # day-1, maximum\_assimilation\_rate  
 kDRespFiAd: 0.004 # day-1, maintenance\_respiration\_constant\_of\_adult\_fish  
 kDRespFiJv: 0.01 # day-1,maintenance\_respiration\_constant\_of\_young\_fish  
 kDRespPisc: 0.005 # day-1 , maint.\_respiration\_constant\_of\_\_Pi\_sc  
 kDRespZoo: 0.15 # day-1,maintenance\_respiration\_constant\_herb.zooplankton  
 kMigrFish: 0.001 # day-1,fish\_migration\_rate  
 kMigrPisc: 0.001 # day-1,\_Pi\_sc\_migration\_rate  
 kMortFiAd: 0.00027 # day-1 , specific\_mortality\_of\_adult\_fish(: \_0.1\_y-1)  
 kMortFiJv: 0.00137 # day-1 ,specific\_mortality\_of\_young\_fish(: \_0.1\_y-1)  
 kMortPisc: 0.00027 # day-1,specific\_mortality\_of\_\_Pi\_sc\_: \_0.1\_y-1  
 kMortZoo: 0.04 # day-1,mortality\_constant\_herb.zooplankton  
 cNDBlueMax: 0.15 # mgN/mgDW, max. N/day ratio bluegreens

cNDBlueMin: 0.03    # mgN/mgDW, minimum N/day ratio bluegreens  
 cNDDiatMax: 0.05    # mgN/mgDW, max. N/day ratio diatoms  
 cNDDiatMin: 0.01    # mgN/mgDW, minimum N/day ratio diatoms  
 cNDGrenMax: 0.1    # mgN/mgDW, max. N/day ratio greens  
 cNDGrenMin: 0.02    # mgN/mgDW, minimum N/day ratio greens  
 cPDBlueMax: 0.025    # mgP/mgDW, max. P/day ratio blue-greens  
 cPDBlueMin: 0.0025    # mgP/mgDW, minimum P/day ratio bluegreens  
 cPDDiatMax: 0.005    # mgP/mgDW, max. P/day ratio diatoms  
 cPDDiatMin: 0.0005    # mgP/mgDW, minimum P/day ratio diatoms  
 cPDGrenMax: 0.015    # mgP/mgDW, max. P/day ratio greens  
 cPDGrenMin: 0.0015    # mgP/mgDW, minimum P/day ratio greens

**coupling:**

diatom\_as\_food\_DW: phytoplankton\_water/sDDiatW  
 green\_as\_food\_DW: phytoplankton\_water/sDGrenW  
 blue\_as\_food\_DW: phytoplankton\_water/sDBlueW  
 detritus\_DW\_pool\_water: abiotic\_water/sDDetW  
 diatom\_as\_food\_N: phytoplankton\_water/sNDiatW  
 green\_as\_food\_N: phytoplankton\_water/sNGrenW  
 blue\_as\_food\_N: phytoplankton\_water/sNBlueW  
 detritus\_N\_pool\_water: abiotic\_water/sNDetW  
 diatom\_as\_food\_P: phytoplankton\_water/sPDiatW  
 green\_as\_food\_P: phytoplankton\_water/sPGrenW  
 blue\_as\_food\_P: phytoplankton\_water/sPBlueW  
 detritus\_P\_pool\_water: abiotic\_water/sPDetW  
 detritus\_Si\_pool\_water: abiotic\_water/sSiDetW  
 NH4\_pool\_water: abiotic\_water/sNH4W  
 NO3\_pool\_water: abiotic\_water/sNO3W  
 PO4\_pool\_water: abiotic\_water/sPO4W

submerged\_vegetation: macrophytes/aDSubVeg  
env\_correction\_adfish: foodweb\_sediment/tDEnvFiAd  
food\_limit\_function\_adfish: foodweb\_sediment/aDSatFiAd

### **S3.7 FABM-PCLake\_foodweb\_sediment**

**model:** pclake\_foodweb\_sediment

**long\_name:** foodweb\_components\_in\_sediment

**initialization:**

sDBent: 1.0 # zoobenthos\_DW\_in\_lake\_sediment

sPBent: 0.01 # zoobenthos\_P\_in\_lake\_sediment

sNBent: 0.07 # zoobenthos\_N\_in\_lake\_sediment

**parameters:**

cDBentIn: 0.01 # gDW/m2,external\_zoobenthos\_density

cDCarrBent: 10.0 # gDW/m2,carrying\_capacity\_of\_zoobenthos

cDCarrFish: 15 # gDW/m2,carrying\_capacity\_of\_fish(: \_100\_gFW/m2,Grimm\_1983)

cNDBentRef: 0.07 # mgN/mgDW, reference\_N/C\_ratio\_of\_zoobenthos

cNDFishRef: 0.1 # mgN/mgDW,reference\_N/C\_ratio\_of\_Fish

cPDBentRef: 0.01 # mgP/mgDW,reference\_P/C\_ratio\_of\_zoobenthos

cPDFishRef: 0.022 # mgP/mgDW,reference\_P/C\_ratio\_of\_Fish

cRelVegFish: 0.009 # -,decrease\_of\_fish\_feeding\_per\_%\_vegetation\_cover(max.\_0.01)

cSiDDiat: 0.15 # mgSi/mgDW, Si/DW\_ratio\_of\_diatoms

cSigTmBent: 16.0 #

°C,temperature\_constant\_of\_zoobenthos(sigma\_in\_Gaussian\_curve)

cSigTmFish: 10 # °C,temperature\_constant\_of\_fish(sigma\_in\_Gaussian\_curve)

cTmOptBent: 25.0 # °C, optimum\_temp.\_of\_zoobenthos

cTmOptFish: 25 # °C , optimum\_temp.\_of\_fish

fDAssBent: 0.3 # -,C\_ass.\_efficiency\_of\_zoobenthos

fDAssFiAd: 0.4      # -,C\_assimilation\_efficiency\_of\_adult\_fish  
 fDissEgesBent: 0.25    # -,soluble\_nutrient\_fraction\_of\_by\_zoobenthos\_egested\_food  
 fDissEgesFish: 0.25    # -,soluble\_nutrient\_fraction\_of\_by\_fish\_egested\_food  
 fDissMortBent: 0.1     # -,soluble\_P\_fraction\_of\_died\_zoobenthos\_P  
 hDBentFiAd: 2.5       # g/m2,half-saturating\_zoobenthos\_biomass\_for\_adult\_fish\_predation  
 hDFoodBent: 200.0     # g/m2,half-saturating\_food\_for\_zoobenthos  
 kDAssBent: 0.1        # day-1, maximum\_assimilation\_rate  
 kDAssFiAd: 0.06      # day-1 ,maximum\_assimilation\_rate\_of\_adult\_fish  
 kDRespBent: 0.005    # day-1,maint.\_respiration\_constant\_of\_zoobenthos  
 kDRespFiAd: 0.004    # day-1 ,maintenance\_respiration\_constant\_of\_adult\_fish  
 kMigrBent: 0.001     # day-1,zoobenthos\_migration\_rate  
 kMortBent: 0.005     # day-1 ,mortality\_constant\_of\_zoobenthos  
 kMortFiAd: 0.00027   # day-1,specific\_mortality\_of\_adult\_fish(: \_0.1\_y-1)  
 cNDBlueMax: 0.15    # mgN/mgDW, max. N/day ratio bluegreens  
 cNDBlueMin: 0.03    # mgN/mgDW, minimum N/day ratio bluegreens  
 cNDDiatMax: 0.05    # mgN/mgDW, max. N/day ratio diatoms  
 cNDDiatMin: 0.01    # mgN/mgDW, minimum N/day ratio diatoms  
 cNDGrenMax: 0.1     # mgN/mgDW, max. N/day ratio greens  
 cNDGrenMin: 0.02    # mgN/mgDW, minimum N/day ratio greens  
 cPDBlueMax: 0.025   # mgP/mgDW, max. P/day ratio bluegreens  
 cPDBlueMin: 0.0025   # mgP/mgDW, minimum P/day ratio bluegreens  
 cPDDiatMax: 0.05    # mgP/mgDW, max. P/day ratio diatoms  
 cPDDiatMin: 0.005   # mgP/mgDW, minimum P/day ratio diatoms  
 cPDGrenMax: 0.015   # mgP/mgDW, max. P/day ratio greens  
 cPDGrenMin: 0.0015   # mgP/mgDW, minimum P/day ratio greens

**coupling:**

diatom\_as\_food\_DW: phytoplankton\_sediment/sDDiatS

green\_as\_food\_DW: phytoplankton\_sediment/sDGrenS  
blue\_as\_food\_DW: phytoplankton\_sediment/sDBlueS  
diatom\_as\_food\_N: phytoplankton\_sediment/sNDiatS  
green\_as\_food\_N: phytoplankton\_sediment/sNGrenS  
blue\_as\_food\_N: phytoplankton\_sediment/sNBlueS  
diatom\_as\_food\_P: phytoplankton\_sediment/sPDiatS  
green\_as\_food\_P: phytoplankton\_sediment/sPGrenS  
blue\_as\_food\_P: phytoplankton\_sediment/sPBlueS  
detritus\_DW\_pool\_sediment: abiotic\_sediment/sDDetS  
detritus\_P\_pool\_sediment: abiotic\_sediment/sPDetS  
detritus\_N\_pool\_sediment: abiotic\_sediment/sNDetS  
detritus\_Si\_pool\_sediment: abiotic\_sediment/sSiDetS  
NH4\_pool\_sediment: abiotic\_sediment/sNH4S  
NO3\_pool\_sediment: abiotic\_sediment/sNO3S  
PO4\_pool\_sediment: abiotic\_sediment/sPO4S  
adult\_fish\_biomass: foodweb\_water/sDFiAd  
adult\_fish\_nitrogen: foodweb\_water/sNFiAd  
adult\_fish\_phosphorus: foodweb\_water/sPFiAd  
NH4\_pool\_water: abiotic\_water/sNH4W  
PO4\_pool\_water: abiotic\_water/sPO4W  
DDet\_pool\_water: abiotic\_water/sDDetW  
NDet\_pool\_water: abiotic\_water/sNDetW  
PDet\_pool\_water: abiotic\_water/sPDetW  
vegetation\_coverage: macrophytes/aCovVeg  
young\_fish\_biomass: foodweb\_water/sDFiJv

### **S3.8 FABM-PCLake\_auxiliary**

**model: pclake\_auxiliary**

**long\_name: extra\_processes**

**parameters:**

cDepthS: 0.1           # sediment depth [m]

cThetaSet: 1.01       #  $1/e^{\circ C}$ , temp. parameter of sedimentation

kVegResus: 0.01       # m<sup>2</sup>/gDW, rel. resuspension reduction per g vegetation

kTurbFish: 1.0        # g/g fish/day, relative resuspension by adult fish browsing

cSuspRef: 0.5         # reference suspended matter function [-]

cSuspMin: 6.1         # minimum value of logistic function

cSuspMax: 25.2        # maximum value of logistic function

cSuspSlope: 2.1       # slope of logistic function

hDepthSusp: 2.0       # half-sat. value of depth in logistic function

cFetchRef: 1000.0     # reference fetch [m]

cFetch: 1000.0        # fetch [m], the length of the lake in the prevailing wind direction

fLutum: 0.1           # lutum content of inorg. matter

fLutumRef: 0.2        # reference lutum fraction

bPorS: 0.847947       # porosity [m<sup>3</sup> water m<sup>-3</sup> sediment]

kResusPhytMax: 0.25   # day<sup>-1</sup>, max. \_phytopl.\_resuspension

cResusPhytExp: -0.379 # (gDW/m<sup>2</sup>/day)<sup>-1</sup>, exp. \_par.\_for \_phytopl.\_resuspension

cVSetIM: 1.0          # m/day, max. sedimentation velocity of inert org. matter

cVSetDet: 0.25        # m/day, max. sedimentation velocity of detritus

cVSetDiat: 0.5        # m/day, sedimentation velocity diatoms

cVSetGren: 0.2        # m/day, sedimentation velocity of greens

cVSetBlue: 0.06       # m/day, sedimentation velocity blue-greens

cRhoIM: 2500000.0     # g/m<sup>3</sup> solid, density of sediment IM

cRhoOM: 1400000.0     # g/m<sup>3</sup>, density of sediment detritus

fDOrgSoil: 0.1        # fraction soil organic matter

cPO4Ground: 0.1       # mgP/l, PO<sub>4</sub> conc in groundwater

cNH4Ground: 1.0      # mgN/l, NH4 cone in groundwater  
 cNO3Ground: 0.1      # mgN/l, NO3 cone in groundwater  
 cTmOptFish: 25      # °C,optimum\_temp.\_of\_fish  
 cSigTmFish: 10      # °C,temperature\_constant\_of\_fish(sigma\_in\_Gaussian\_curve)  
 cLoadPO4: 0.005      # gP/m2/day, constant, different from cLoadIM  
 cLoadNO3: 0.05      # gN/m2/day, constant  
 uQIn: 20.0      # mm/day, net water load rate, constant  
 cDErosTot: 0.1      # g/m2/day,Erosion\_input\_(tentative)  
 fSedErosIM: 0.95      # instantly\_sedimentating\_fraction\_of\_IM  
 cNDBlueMax: 0.15      # mgN/mgDW, max. N/day ratio bluegreens  
 cNDBlueMin: 0.03      # mgN/mgDW, minimum N/day ratio bluegreens  
 cNDDiatMax: 0.05      # mgN/mgDW, max. N/day ratio diatoms  
 cNDDiatMin: 0.01      # mgN/mgDW, minimum N/day ratio diatoms  
 cNDGrenMax: 0.1      # mgN/mgDW, max. N/day ratio greens  
 cNDGrenMin: 0.02      # mgN/mgDW, minimum N/day ratio greens  
 cPDBlueMax: 0.025      # mgP/mgDW, max. P/day ratio bluegreens  
 cPDBlueMin: 0.0025      # mgP/mgDW, minimum P/day ratio bluegreens  
 cPDDiatMax: 0.005      # mgP/mgDW, max. P/day ratio diatoms  
 cPDDiatMin: 0.0005      # mgP/mgDW, minimum P/day ratio diatoms  
 cPDGrenMax: 0.015      # mgP/mgDW, max. P/day ratio greens  
 cPDGrenMin: 0.0015      # mgP/mgDW, minimum P/day ratio greens

**coupling:**

Amonia\_pool\_in\_water: abiotic\_water/sNH4W  
 Nitrates\_pool\_in\_water: abiotic\_water/sNO3W  
 Phosphate\_pool\_in\_water: abiotic\_water/sPO4W  
 Adsorbed\_phosphrus\_in\_water: abiotic\_water/sPAIMW  
 Oxygen\_pool\_in\_water: abiotic\_water/sO2W  
 Inorg\_pool\_in\_water: abiotic\_water/sDIMW

Detritus\_DW\_in\_water: abiotic\_water/sDDetW  
Detritus\_N\_in\_water: abiotic\_water/sNDetW  
Detritus\_P\_in\_water: abiotic\_water/sPDetW  
Detritus\_Si\_in\_water: abiotic\_water/sSiDetW  
Diatom\_DW\_in\_water: phytoplankton\_water/sDDiatW  
Green\_DW\_in\_water: phytoplankton\_water/sDGrenW  
Blue\_DW\_in\_water: phytoplankton\_water/sDBlueW  
Diatom\_N\_in\_water: phytoplankton\_water/sNDiatW  
Green\_N\_in\_water: phytoplankton\_water/sNGrenW  
Blue\_N\_in\_water: phytoplankton\_water/sNBlueW  
Diatom\_P\_in\_water: phytoplankton\_water/sPDiatW  
Green\_P\_in\_water: phytoplankton\_water/sPGrenW  
Blue\_P\_in\_water: phytoplankton\_water/sPBlueW  
Amonia\_pool\_in\_sediment: abiotic\_sediment/sNH4S  
Nitrates\_pool\_in\_sediment: abiotic\_sediment/sNO3S  
Phosphate\_pool\_in\_sediment: abiotic\_sediment/sPO4S  
Adsorbed\_phosphrus\_in\_sediment: abiotic\_sediment/sPAIMS  
Inorg\_pool\_in\_sediment: abiotic\_sediment/sDIMS  
Detritus\_DW\_in\_sediment: abiotic\_sediment/sDDetS  
Detritus\_N\_in\_sediment: abiotic\_sediment/sNDetS  
Detritus\_P\_in\_sediment: abiotic\_sediment/sPDetS  
Detritus\_Si\_in\_sediment: abiotic\_sediment/sSiDetS  
Diatom\_DW\_in\_sediment: phytoplankton\_sediment/sDDiatS  
Green\_DW\_in\_sediment: phytoplankton\_sediment/sDGrenS  
Blue\_DW\_in\_sediment: phytoplankton\_sediment/sDBlueS  
Diatom\_N\_in\_sediment: phytoplankton\_sediment/sNDiatS  
Green\_N\_in\_sediment: phytoplankton\_sediment/sNGrenS  
Blue\_N\_in\_sediment: phytoplankton\_sediment/sNBlueS

Diatom\_P\_in\_sediment: phytoplankton\_sediment/sPDiatS  
Green\_P\_in\_sediment: phytoplankton\_sediment/sPGrenS  
Blue\_P\_in\_sediment: phytoplankton\_sediment/sPBlueS  
vegetation\_DW: macrophytes/sDVeg  
adult\_fish\_DW: foodweb\_water/sDFiAd  
Detritus\_abiotic\_update: abiotic\_sediment/tDAbioDetS  
Detritus\_from\_algae: phytoplankton\_sediment/tDPrimDetS  
Detritus\_from\_vegetation: macrophytes/tDBedDetS  
Detritus\_from\_foodweb: foodweb\_sediment/tDWebDetS  
Humus\_DW\_in\_sediment: abiotic\_sediment/sDHumS  
Humus\_N\_in\_sediment: abiotic\_sediment/sNHumS  
Humus\_P\_in\_sediment: abiotic\_sediment/sPHumS  
Humus\_abiotic\_update: abiotic\_sediment/tDAbioHumS  
Zooplankton\_DW: foodweb\_water/sDZoo  
Zooplankton\_P: foodweb\_water/sPZoo  
Zooplankton\_N: foodweb\_water/sNZoo  
SiO2\_pool\_water: abiotic\_water/sSiO2W

#### **S4. References**

Janse, J. H. 2005. Model studies on the eutrophication of shallow lakes and ditches, publisher not identified.
