# Supplementary material for: FABM-PCLake – linking aquatic ecology with hydrodynamics
Source: Copernicus journal article supplement (doi:10.5194/gmd-2015-260), 2016-02-03
Supplement: Supplementary file [file gmd-2015-260-AC1-supplement.pdf]

1 **FABM-PCLake – linking aquatic ecology with**  
2 **hydrodynamics**

3

4 **F. Hu<sup>1,2\*</sup>, K. Bolding<sup>1,3</sup>, J. Bruggeman<sup>3,4</sup>, E. Jeppesen<sup>1,5</sup>, M.R. Flindt<sup>2</sup>, L. van**  
5 **Gerven<sup>6,7</sup>, J.H. Janse<sup>6,8</sup>, A.B.G. Janssen<sup>6,7</sup>, J.J. Kuiper<sup>6,7</sup>, W.M. Mooij<sup>6,7</sup>, D.**  
6 **Trolle<sup>1,5</sup>**

7 [1] Aarhus University, Department of Bioscience, Vejlsøvej 25, 8600 Silkeborg,  
8 Denmark

9 [2] University of Southern Denmark, Department of Biology, Campusvej 55, 5230  
10 Odense M, Denmark

11 [3] Bolding & Bruggeman ApS, Strandgyden 25, 5466 Asperup, Denmark

12 [4] Plymouth Marine Laboratory, Prospect Place, The Hoe, Plymouth PL1 3DH,  
13 United Kingdom

14 [5] Sino-Danish Center for Education and Research, University of Chinese Academy  
15 of Sciences, Beijing

16 [6] Netherlands Institute of Ecology, Department of Aquatic Ecology, 6700 AB  
17 Wageningen, The Netherlands

18 [7] Wageningen University, Department of Aquatic Ecology and Water Quality  
19 Management, 6700 AA, The Netherlands

20 [8] PBL Netherlands Environmental Assessment Agency, Dept. of Nature and Rural  
21 Areas, 3720 AH Bilthoven, The Netherlands

22 \*Corresponce to: Fenjuan Hu ([fenjuan.hu@gmail.com](mailto:fenjuan.hu@gmail.com))

23

## 1 Abstract

2 | This study presents FABM-PCLake, a ~~complete~~-redesigned structure of the PCLake  
3 aquatic ecosystem model, which we implemented into the Framework for Aquatic  
4 Biogeochemical Models (FABM). In contrast to the original model, which was  
5 designed for temperate, fully mixed freshwater lakes, the new FABM-PCLake  
6 | represents an integrated aquatic ecosystem model that can be linked with different  
7 hydrodynamic models and allows ~~enables~~—simulations of hydrodynamics and  
8 biogeochemical processes for zero-dimensional, one-dimensional as well as three-  
9 | dimensional ~~heterogeneous~~—environments. FABM-PCLake describes interactions  
10 between multiple trophic levels, including piscivorous, zooplanktivorous and  
11 benthivorous fish, zooplankton, zoobenthos, three groups of phytoplankton and  
12 rooted macrophytes. The model also accounts for oxygen dynamics and nutrient  
13 cycling for nitrogen, phosphorus and silicon, both within the pelagic and benthic  
14 domains. FABM-PCLake includes a two-way communication between the  
15 biogeochemical processes and the physics, where some biogeochemical state  
16 variables (e.g., phytoplankton) influence light attenuation and thereby the spatial and  
17 temporal distributions of light and heat. At the same time, the physical environment,  
18 including water currents, light and temperature influence a wide range of  
19 biogeochemical processes. The model enables studies on ecosystem dynamics in  
20 physically heterogeneous environments (e.g., stratifying water bodies, and water  
21 bodies with horizontal gradient in physical and biogeochemical properties), and  
22 through FABM also enables data assimilation and multi-model ensemble simulations.  
23 | Examples of ~~relevant~~-potential new model applications include climate change impact  
24 studies and environmental impact assessment scenarios for temperate, sub-tropical  
25 and tropical lakes and reservoirs ~~worldwide~~.

26

## 27 1 Introduction

28 The field of aquatic ecosystem modelling has undergone waves of development  
29 during the past decades, and models have grown in complexity in terms of  
30 ecosystem components and processes included (Robson, 2014). However, even  
31 though hundreds of models have been formulated for research or management  
32 purposes, only a handful has found frequent use and ongoing development (Trolle et

1 al., 2012). This reflects that many models are being built with the same or similar  
2 properties, and thus that model development for the past decades has been subject  
3 to some degree of “re-inventing the wheel” as discussed by Mooij et al (2010).  
4 Another drawback of many aquatic ecosystem models is the typical discrepancy in  
5 complexity between the ecosystem representation and the physical environment.  
6 ~~Hence, few studies have attempted to couple aquatic ecosystem dynamics including~~  
7 ~~higher trophic levels (e.g., fish) and explicit physical dynamics (one example is the~~  
8 ~~study by Makler-Pick et al. (2011)), which, however, is not readily available for further~~  
9 ~~developments).~~ High complexity in ecosystem conceptualizations therefore generally  
10 comes at the expense of simple or no hydrodynamic representation (e.g., PCLake  
11 (Janse and van Liere, 1995; Janse, 2005; Janse et al., 2008) and EcoPath  
12 (Christensen and Pauly, 1992)). By contrast, physically resolved hydrodynamic  
13 models often include no or only simple ecosystem representations, and disregard  
14 higher trophic levels. Few studies have attempted to couple aquatic ecosystem  
15 dynamics (e.g., Hamilton and Schladow, 1997; Pereira et al., 2006; Fragoso et al.,  
16 2009), sometimes also including higher trophic levels (Makler-Pick et al., 2011).  
17 However, none of these models are validated for higher trophic levels (i.e. fish) and  
18 the source codes are also not readily available for further development. To avoid “re-  
19 inventing the wheel”, and to overcome this discrepancy in complexity between the  
20 ecological and physical representation, a way forward is to enable an easy coupling  
21 between existing ecosystem models and hydrodynamic models. Thus, the complexity  
22 of the conceptual biogeochemical model and the physical representation may readily  
23 be adapted to best suit the needs and purposes of a given study. Meanwhile, utilizing  
24 an open source platform would help promote model availability and also further  
25 development (Trolle et al., 2012). To this end, we implemented and modified a well-  
26 developed and widely applied ecosystem model, PCLake, within FABM, the  
27 Framework for Aquatic Biogeochemical Models by Bruggeman and Bolding (2014).  
28 FABM enables a flexible coupling of ecosystem processes in PCLake with a  
29 selection of hydrodynamic models representing zero- to three-dimensional  
30 hydrodynamics.

31

## 1 2 Implementation of PCLake in FABM

2 PCLake is originally a zero-dimensional ecological model for shallow lakes  
3 developed by Janse and van Liere (1995) and it has been widely applied (for  
4 example, Stonevičius and Taminskas, 2007; Mooij et al., 2009; Nielsen et al., 2014;  
5 further references in Mooij et al., 2010). The model describes the dynamics of  
6 phytoplankton, macrophytes and a simplified food web including zooplankton,  
7 zoobenthos, zooplanktivorous fish, benthivorous fish and piscivorous fish, and  
8 accounts for mass balances, represented by dry weight, nitrogen, phosphorus and  
9 silicon cycling between the various components of the ecosystem. The original  
10 PCLake model (documented in detail in Janse (2005)) contains detailed biological  
11 processes within the water column and also a relatively advanced biogeochemical  
12 sediment module (describing nutrient dynamics in the sediment top layer and  
13 exchanges with the water column), while thermo- and hydrodynamics are not  
14 explicitly accounted for. The original model also includes a marsh module describing  
15 (helophytic) marsh vegetation in a zone around a lake, which attempts to account for  
16 interactions between open waters and a more highly vegetated marsh area that may  
17 be present close to the shoreline of some lakes. The main purpose of the model is to  
18 predict critical nutrient loadings, i.e. the loading where a shallow lake may switch  
19 between a clear and a turbid state, related to a non-linear ecosystem response to  
20 nutrient loading as a result of self-enhancing feedback mechanisms within the  
21 ecosystem.

22 FABM, in which we have now implemented PCLake, is a framework for  
23 biogeochemical models of marine and freshwater systems (Bruggeman and Bolding,  
24 2014). FABM enables complex biogeochemical models to be developed as sets of  
25 stand-alone, process-specific modules. These can be combined at runtime to create  
26 custom-tailored models. As outlined in detail by Bruggeman and Bolding (2014),  
27 FABM divides the coupled advection-diffusion-reaction equation that governs the  
28 dynamics of biogeochemical variables into two parts: a reaction part (i.e., sink and  
29 source terms) provided by the biogeochemical models, and a transport part handled  
30 by the hydrodynamic (i.e., physical) models. The transport part includes advection,  
31 diffusion and potential vertical movements (sinking, floating and potentially active  
32 movement), and also dilution and concentration processes. Therefore, based on local

1 variables (including, for example, local light conditions, temperature and  
2 concentrations of state variables) provided by a hydrodynamic model, the  
3 biogeochemical model calculate rates of sink and source terms at current time and  
4 space and pass the rates to the hydrodynamic model via FABM. The hydrodynamic  
5 model will then handle numerical integration of the biogeochemical processes and  
6 transport, and then pass updated states via FABM back to the biogeochemical model  
7 – and this process will continue until the user-defined end-time of a simulation. FABM  
8 thereby enables model applications of different physical representations (ranging 0D  
9 to 3D) without the need to change the biogeochemical source code. Most of the  
10 pelagic state variables in a biogeochemical model implemented in FABM will typically  
11 be transported by the hydrodynamics. However, some pelagic variables, particularly  
12 relevant for higher trophic levels such as fish (that may exhibit active movement  
13 based, for example, on the food source availability), can be set as exempt from  
14 hydrodynamic transport or even include their own custom time and space varying  
15 movement. On the other hand, all benthic state variables, such as macrophytes (that  
16 need to be attached to a “benthic” grid cell), are always exempt from hydrodynamic  
17 transport. Further detail on the concept of FABM is provided in Bruggeman and  
18 Bolding (2014).

19 Besides PCLake, a series of large ecosystem models have been implemented in  
20 FABM. These include representations of the European Regional Seas Ecosystem  
21 Model (ERSEM, Butenschön et al., 2016) and the lake model Aquatic EcoDynamics  
22 (AED, Hipsey et al., 2013). But in contrast to PCLake, none of these include higher  
23 trophic levels such as fish. FABM is written in Fortran2003 and therefore FABM-  
24 PCLake is also implemented in Fortran2003. The key difference between the new  
25 FABM-PCLake (Fig. 1) and the original PCLake conceptual model (e.g., Janse et al.  
26 2010) is that FABM-PCLake can now be linked to enables physical models. Hence,  
27 a major advantage of FABM-PCLake is that the detailed biogeochemical processes  
28 provided by PCLake can now be used to study deep (i.e. stratifying) and spatially  
29 complex aquatic ecosystems. While the core of the overall conceptual model of the  
30 PCLake “lake part” remains intact, the underlying mechanisms of processes that  
31 relate to transport have changed. For example, while the resuspension rate of  
32 detritus (represented by an arrow going from the bottom sediments to the water  
33 column in Fig. 1) is derived from an empirical relation to lake fetch in the original

1 PCLake ~~(represented by an arrow going from the bottom sediments to the water~~  
2 ~~column in Fig. 1)~~, resuspension rate in FABM-PCLake can now be derived from the  
3 actual bottom shear stress as computed by the physical model simulated by and  
4 passed via FABM to the biogeochemical model. When implementing PCLake into  
5 FABM, a series of modifications relative to the original PCLake model were made.  
6 This was done because some of the processes parameterized in the original PCLake  
7 model can now be resolved explicitly by the hydrodynamic models and the  
8 functionalities of FABM.

9 The main modifications are:

- 10 1) excluding the marsh module (as any two- or three-dimensional exchanges of  
11 solutes can now be resolved by an explicit physical domain);
- 12 2) excluding the original loading, dilution and water level burial correction  
13 processes (as this will now instead be resolved by the physical model and its  
14 boundary conditions);
- 15 3) excluding the original (and optional) forcing for dredging processes and fish  
16 harvesting (as similar functionality is now provided through the state variable  
17 time series forcing enabled by FABM);
- 18 4) adding the option to make resuspension directly dependent on bottom shear  
19 stress provided by the hydrodynamic model. This functionality is derived from  
20 the PCLake integral resuspension function and the shear-stress correlated  
21 resuspension function by Hamilton (1996)– and may now be used as an  
22 alternative to the original empirical resuspension function, which was related  
23 only to the average lake fetch;
- 24 5) extending the available options for describing light limitation functions for  
25 individual phytoplankton groups and macrophytes (currently including both an  
26 integral function based on a Monod-type equation and the original Steele  
27 equation, which accounts for photo-inhibition (Di Toro and Matystik 1980).

28 To maintain the integrity of the original PCLake model, in terms of process rates that  
29 are formulated ~~on bases of using~~ daily averaged ~~incoming~~ light, we used the ability of  
30 FABM to provide daily averaged values of photosynthetically active radiation (PAR)  
31 for the centre point in any given water column cell. In total, the FABM-PCLake  
32 implementation comprises 57 state variables. These include representations of

1 oxygen dynamics, organic and inorganic forms of nitrogen, phosphorus and silicon,  
2 three phytoplankton groups, one zooplankton and one zoobenthos group,  
3 zooplanktivorous and zoobenthivorous fish (representing juveniles and adult fish,  
4 respectively), piscivorous fish and submerged macrophytes (Fig. 1). A complete  
5 record of the partial differential equations for each state variable can be found in the  
6 Supplementary Material.

7 The code implementation involved a complete redesign and rewrite of the PCLake  
8 code into a FABM compliant modular structure (see Fig. 2 and Supplementary  
9 material, supplementary table S1), thus allowing FABM to acquire sink and source  
10 terms for each state variable differential equation, and pass these for numerical  
11 solution and transportation by a physical host model. By implementing the model in  
12 FABM, one can now combine different ecosystem modules from different  
13 biogeochemical models available in FABM to suit the study purpose (such as running  
14 the phytoplankton module from the AED model together with the zooplankton module  
15 from the PCLake model to simulate the ecosystem for a particular case study).  
16 Another important FABM feature is the ability to undertake data assimilation at  
17 runtime, where simulated state variables can be “relaxed” to values of observations  
18 that are read-in during a simulation. Hereby, one can ~~enforce~~ assimilate certain  
19 components (e.g., macrophyte or zooplankton) of the ecosystem with observation  
20 data (e.g., macrophyte seasonality), while simulating other parts of the ecosystem  
21 dynamically. The model code was divided into modules of abiotic, phytoplankton,  
22 macrophytes and food web dynamics. These modules were further sub-divided into  
23 water column (pelagic) and sediment (benthic) domains. Concurrently, we developed  
24 an auxiliary module for FABM-PCLake to handle the overall system processes. The  
25 overall system processes are the processes that will typically influence several other  
26 modules, and they include resuspension, sedimentation and burial. In PCLake, burial  
27 is included as a representation of the natural process of sediment accumulation,  
28 which is caused by excessive sedimentation (resuspension rate < sedimentation  
29 rate) of particles at the sediment-water interface. a process that can prevent a net  
30 increase of sediment material by burial of a small layer of sediment, equally thick as  
31 the layer that had been added to it. The “buried” is material is then considered as  
32 buried inactive in the sediment biogeochemical processes and in the deeper sediment  
33 and lost/excluded from the system.

1

## 2 **3 Model verification**

3 To ensure that all biogeochemical processes have been implemented correctly  
4 through the equations in FABM-PCLake, we verified the model by running a  
5 benchmark test case against the original PCLake model. Hence, we compared  
6 output from the original PCLake model (zero-dimensional, using the OSIRIS version,  
7 i.e. a C++ executable called from a Microsoft Excel shell) with that from FABM-  
8 PCLake model executed with a zero-dimensional driver. The models were applied  
9 with identical model initialization and parameterization, and the same forcing and  
10 boundary conditions in terms of inflow, water temperature, light and nutrient loads for  
11 a 5-year period. The initial values for state variables and model parameterization  
12 were taken from the original PCLake version, which has been calibrated using data  
13 from 43 European lakes (Janse et al., 2010), most of which were Dutch lakes, but  
14 also included a few lakes from Belgium, Poland and Ireland. To ensure comparability,  
15 we left the Marsh module in the original PCLake model turned off, and used the  
16 simple empirical resuspension function (this function remains as an optional function  
17 in the FABM-PCLake model, while we also implemented a bottom stress driven  
18 resuspension process) in the FABM-PCLake version. Moreover, for the purpose of  
19 the benchmark test, processes that are not included in the new FABM-PCLake, such  
20 as water column burial correction, dredging and fish harvesting, were turned off in the  
21 original PCLake model. We found that there were only marginal differences between  
22 the outputs of the two model versions, which could be attributed to small differences  
23 in the numerical solvers of the models (Fig. 3). We therefore conclude that the new  
24 FABM-PCLake implementation provides corresponding representations of ecosystem  
25 dynamics, relative to the original PCLake model.

26

## 27 ~~4 Model features and perspectives~~ Model applicability, limitations and 28 perspectives

29 The FABM-PCLake model is now able to run with a selection of hydrodynamic  
30 models (which can be simply selected by the user), covering zero-dimensional  
31 (included with the FABM source code), one-dimensional (e.g., the General Ocean  
32 Turbulence Model, GOTM – <http://www.gotm.net>, and the General Lake Model, GLM



1 – <http://aed.see.uwa.edu.au/research/models/GLM>) as well as three-dimensional  
2 (e.g., the General Estuary Transport Model, GETM – [www.getm.eu](http://www.getm.eu), Modular Ocean  
3 Model, MOM - <http://mom-ocean.org> and work in progress - Nucleus for European  
4 Modelling of the Ocean, NEMO <http://www.nemo-ocean.eu>, and The Unstructured  
5 Grid Finite Volume Community Ocean Model, FVCOM -  
6 <http://fvcom.smast.umassd.edu/fvcom> ) hydrodynamic models. A major advantage of  
7 this development is that the detailed ecological processes provided by PCLake can  
8 now be used to study deep and spatially complex aquatic ecosystems. For example,  
9 macrophytes was originally represented as a single value in g/m<sup>2</sup> for a zero-  
10 dimensional model, but is now able to colonize different depths, for example when  
11 coupled to a 1D hypsographic hydrodynamic model, which allows a more gradual  
12 shift in the ecological states more typical for real lakes, even when shallow  
13 (Jeppesen et al., 2007). In addition, it becomes possible to study the concept of  
14 critical nutrient loading for spatially heterogeneous aquatic systems. This is important  
15 because the concept of regime shifts in ecosystems is widely acknowledged in  
16 science and ecosystem management, while the effect of spatial heterogeneity on the  
17 occurrence of regime shifts is poorly understood (Janssen et al., 2014). Other key  
18 features enabled by FABM are:

- 19 1) the ability to replace one or several of the PCLake modules (e.g.,  
20 phytoplankton) with that from another ecosystem model available through  
21 FABM (e.g., ERGOM, ERSEM or AED);
- 22 2) the ability to forceassimilate time-seriesobservation data for some state  
23 variables ~~(i.e., data assimilation)~~ while others are left fully dynamic (e.g., one  
24 could ~~force-assimilate time-series-of~~ macrophyte biomass data, and ~~look~~  
25 atsimulate the response of fish, zooplankton, phytoplankton etc.);
- 26 3) the ability to run multiple models in an ensemble (e.g., for inter-model  
27 comparisons).

28  
29 As we have tried to maintain the overall integrity of the ecological model PCLake,  
30 some process descriptions may be improved to allow a more conceptually correct  
31 ecosystem representation in a physically explicit context. For example, higher  
32 hydrodynamic resolutions (i.e., 1D, 2D and 3D domains), could now allow a more

1 [advanced description of the behavior of macrophytes and fish. One example could](#)  
2 [be implementation of a more advanced macrophyte module that could dynamically](#)  
3 [re-allocate macrophyte biomass across pelagic grids such as the work presented by](#)  
4 [Sachse et al. \(2014\). Other examples counts potential advances for the fish module,](#)  
5 [which could include active fish movement \(e.g., through an individual-based model\),](#)  
6 [or implementation of the foraging arena theory \(Ahrens et al. 2012\) as adopted in the](#)  
7 [ECOPATH model.](#)

## 9 **5 Sample case simulation outputs**

10 Whether run as a zero-, one- or three-dimensional model application, the model  
11 executable will generate an output file of NetCDF format (\*.nc), which can be opened  
12 and manipulated by a range of software packages (e.g, Matlab, IDL) and a range of  
13 free NetCDF viewers, such as PyNcView (<http://sourceforge.net/projects/pyncview>).  
14 The latter provides an easy-to-use graphical user interface (GUI) for creation of  
15 animations and publication-quality figures. [Figure 4 demonstrates](#) (a screenshot of  
16 [this interface features, with](#) visualization of FABM-PCLake state variables [in a 1D](#)  
17 [context. Output from a one-year case simulation of temperature and macrophyte](#)  
18 [depth profiles](#) is shown in Figure 5. This output was produced by linking FABM-  
19 [PCLake with the 1D GOTM model \(including a hypsograph that describes the](#)  
20 [relationship between depth and sediment area\) for a hypothetical temperate 20m](#)  
21 [deep lake \(with default PCLake parameterization\). -is demonstrated in Fig. 4\).](#)

## 24 **Code availability**

25 The model can be compiled and executed on Windows, Linux, and Mac OS  
26 machines, and is open source and freely available under the GNU General Public  
27 License (GPL) version 2. Source code, executables, and test cases can be  
28 downloaded directly from <http://fabm.net>, or as git repositories (updated information  
29 on how to download the code from git repositories as well as compiling the code for  
30 different platforms is available from the FABM wiki at <http://fabm.net/wiki>). Contact  
31 persons for FABM-PCLake model: Fenjuan Hu ([fenjuan@bios.au.dk](mailto:fenjuan@bios.au.dk)), Dennis Trolle

1 (trolle@bios.au.dk), Karsten Bolding (bolding@bios.au.dk). Contact persons for the  
2 original zero-dimensional PCLake model: Jan H. Janse (jan.janse@pbl.nl), Wolf. M.  
3 Mooij (w.mooij@nioo.knaw.nl).

4

## 5 **Acknowledgements**

6 This study was supported by CLEAR (a Villum Kann Rasmussen Foundation, Centre  
7 of Excellence project), and MARS (Managing Aquatic ecosystems and water  
8 Resources under multiple Stress) funded under the 7th EU Framework Program,  
9 Theme 6 (Environment including Climate Change), Contract No.: 603378  
10 (<http://www.mars-project.eu>). A.B.G. Janssen was funded by the Netherlands  
11 Organization for Scientific Research (NWO) project no. 842.00.009. J.J. Kuiper and  
12 L.van Gerven were funded by the Netherlands Foundation for Applied Water  
13 Research (STOWA) project no. 443237 and the Netherlands Environmental  
14 Assessment Agency (PBL).

15

## 1 References

- 2 [Ahrens, R.N., Walters, C.J. and Christensen, V., 2012. Foraging arena theory. \*Fish\*](#)  
3 [and \*Fisheries\*, 13\(1\), 41-59.](#)
- 4 Bruggeman, J. and Bolding, K. 2014. A general framework for aquatic  
5 biogeochemical models. *Environmental Modelling & Software* 61: 249-265.
- 6 [Butenschön, M., Clark, J., Aldridge, J. N., Allen, J. I., Artioli, Y., Blackford, J.,](#)  
7 [Bruggeman, J., Cazenave, P., Ciavatta, S., Kay, S., Lessin, G., van Leeuwen, S.,](#)  
8 [van der Molen, J., de Mora, L., Polimene, L., Salliey, S., Stephens, N., and Torres,](#)  
9 [R.: ERSEM 15.06: a generic model for marine biogeochemistry and the ecosystem](#)  
10 [dynamics of the lower trophic levels, \*Geosci. Model Dev.\*, 9, 1293-1339,](#)  
11 [doi:10.5194/gmd-9-1293-2016, 2016.](#)
- 12 Christensen, V. and Pauly, D. 1992. ECOPATH II - a software for balancing steady-  
13 state ecosystem models and calculating network characteristics. *Ecological*  
14 *Modelling* 61: 169-185
- 15 [Di Toro, D.M. and Matystik W.F. 1980. Mathematical models of water quality in large](#)  
16 [lakes. Part 1: Lake Huron and Saginaw Bay. EPA 600/3-80-56, Duluth, MI, USA.](#)
- 17 [Fragoso, C.R., van Nes, E.H., Janse, J.H. and da Motta Marques, D., 2009. IPH-](#)  
18 [TRIM3D-PCLake: A three-dimensional complex dynamic model for subtropical](#)  
19 [aquatic ecosystems. \*Environmental Modelling & Software\*, 24\(11\), 1347-1348.](#)
- 20 [Hamilton, D.P. and Mitchell, S.F., 1996. An empirical model for sediment](#)  
21 [resuspension in shallow lakes. \*Hydrobiologia\*, 317\(3\), 209-220.](#)
- 22 [Hamilton, D.P. and Schladow, S.G., 1997. Prediction of water quality in lakes and](#)  
23 [reservoirs. Part I—Model description. \*Ecological Modelling\*, 96\(1\), pp.91-110.](#)
- 24 [Hipsey, M.R., Bruce, L.C. and Hamilton, D.P. 2013. Aquatic Ecodynamics \(AED\)](#)  
25 [Model Library. Science Manual, October 2013, 34, online:](#)  
26 [http://aed.see.uwa.edu.au/research/models/aed/Download/AED\\_ScienceManual\\_v4](#)  
27 [draft.pdf.](#)
- 28 Janse, J.H. and van Liere, L. 1995. PCLake: A modelling tool for the evaluation of  
29 lake restoration scenarios. *Water Science and Technology* 31(8): 371-374.

- 1 Janse, J.H., 2005. Model studies on the eutrophication of shallow lakes and ditches.  
2 Ph.D. Thesis, Wageningen University, The Netherlands. Available on line at  
3 <http://library.wur.nl/wda/dissertations/dis3748.pdf>.
- 4 Janse, J.H., De Senerpont Domis, L.N., Scheffer, M., Lijklema, L., Van Liere, L.,  
5 Klinge, M., Mooij, W.M., 2008. Critical phosphorus loading of different types of  
6 shallow lakes and the consequences for management estimated with the ecosystem  
7 model PCLake. *Limnologica* 38: 203-219.
- 8 Janse, J.H., Scheffer, M., Lijklema, L., Van Liere, L., Sloot, J.S., Mooij, W.M., 2010.  
9 Estimating the critical phosphorus loading of shallow lakes with the ecosystem model  
10 PCLake: Sensitivity, calibration and uncertainty. *Ecological Modelling*, 221, 654-665.
- 11 Janssen, A.B.G., Teurlincx, S., An, S., Janse, J.H., Paerl, H.W., Mooij, W.M. 2014.  
12 Alternative stable states in large shallow lakes? *Journal of Great Lakes Research* 40:  
13 813-826.
- 14 [Jeppesen, E., Søndergaard M., Meerhoff M., Lauridsen T.L., Jensen J.P. 2007.](#)  
15 [Shallow lake restoration by nutrient loading reduction – some recent findings and](#)  
16 [challenges ahead. – \*Hydrobiologia\* 584:239-252.](#)
- 17 Mooij, W.M., De Senerpont Domis, L.N., Janse, J.H. 2009. Linking species-and  
18 ecosystem-level impacts of climate change in lakes with a complex and a minimal  
19 model. *Ecological Modelling*, 220(21), 3011-3020.
- 20 Mooij, W.M., Trolle, D., Jeppesen, E., Arhonditsis, G.B., Belolipetsky, P.V.,  
21 Chitamwebwa, D.B.R., Degermendzhy, A.G., DeAngelis, D.L., Domis, L.N.D.S.,  
22 Downing, A.S., Elliott, J.A. Fragoso Jr., C.R., Gaedke, U., Genova, S.N., Gulati, R.D.,  
23 Håkanson, L., Hamilton, D.P., Hipsey, M.R., Hoen, J., Hülsmann, S., Los, F.H.,  
24 Makler-Pick, V., Petzoldt, T., Prokopkin, I.G., Rinke, K., Schep, S.A., Tominaga, K.,  
25 Dam, A.A.V., Nes, E.H.V., Wells, S.A., Janse, J.H. 2010. Challenges and  
26 opportunities for integrating lake ecosystem modelling approaches. *Aquatic Ecology*,  
27 44: 633-667.
- 28 Makler-Pick, V., Gal, G., Shapiro, J., & Hipsey, M. R. 2011. Exploring the role of fish  
29 in a lake ecosystem (Lake Kinneret, Israel) by coupling an individual-based fish  
30 population model to a dynamic ecosystem model. *Canadian Journal of Fisheries and*  
31 *Aquatic Sciences*, 68(7), 1265-1284.

- 1 Nielsen, A., Trolle, D., Bjerring, R., Søndergaard, M., Olesen, J. E., Janse, J. H., Wolf  
2 M. Mooij, and Jeppesen, E. 2014. Effects of climate and nutrient load on the water  
3 quality of shallow lakes assessed through ensemble runs by PCLake. *Ecological*  
4 *Applications*, 24(8), 1926-1944.
- 5 [Pereira, A., Duarte, P. and Norro, A., 2006. Different modelling tools of aquatic](#)  
6 [ecosystems: A proposal for a unified approach. \*Ecological Informatics\*, 1\(4\), 407-421.](#)
- 7 Robson, B. J. 2014. State of the art in modelling of phosphorus in aquatic systems:  
8 review, criticisms and commentary. *Environmental Modelling & Software*, 61, 339-  
9 359.
- 10 [Sachse, R., Petzoldt, T., Blumstock, M., Moreira, S., Pätzig, M., Rücker, J., Janse,](#)  
11 [J.H., Mooij, W.M. and Hilt, S., 2014. Extending one-dimensional models for deep](#)  
12 [lakes to simulate the impact of submerged macrophytes on water quality.](#)  
13 [\*Environmental Modelling & Software\*, 61, 410-423.](#)
- 14 Stonevičius, E., & Taminskas, J. 2007. Lake Žuvintas water quality analysis  
15 employing PCLake model. *Ekologija*, 53(2), 51-55.
- 16 Trolle, D., Hamilton, D.P., Hipsey, M.R., Bolding, K., Bruggeman, J., Mooij, W.M.,  
17 Janse, J.H., Nielsen, A., Jeppesen, E., Elliott, A., Makler-Pick, V, Petzoldt, T., Rinke,  
18 K., Flindt, M.R., Arhonditsis, G.B., Gal, G., Bjerring, R., Tominaga, K., Hoen, J.,  
19 Downing, A.S., Marques, D.M., Fragoso, C.R., Søndergaard, M. and Hanson, P.C.  
20 2012. A community-based framework for aquatic ecosystem models. *Hydrobiologia*,  
21 683: 25-34.

1

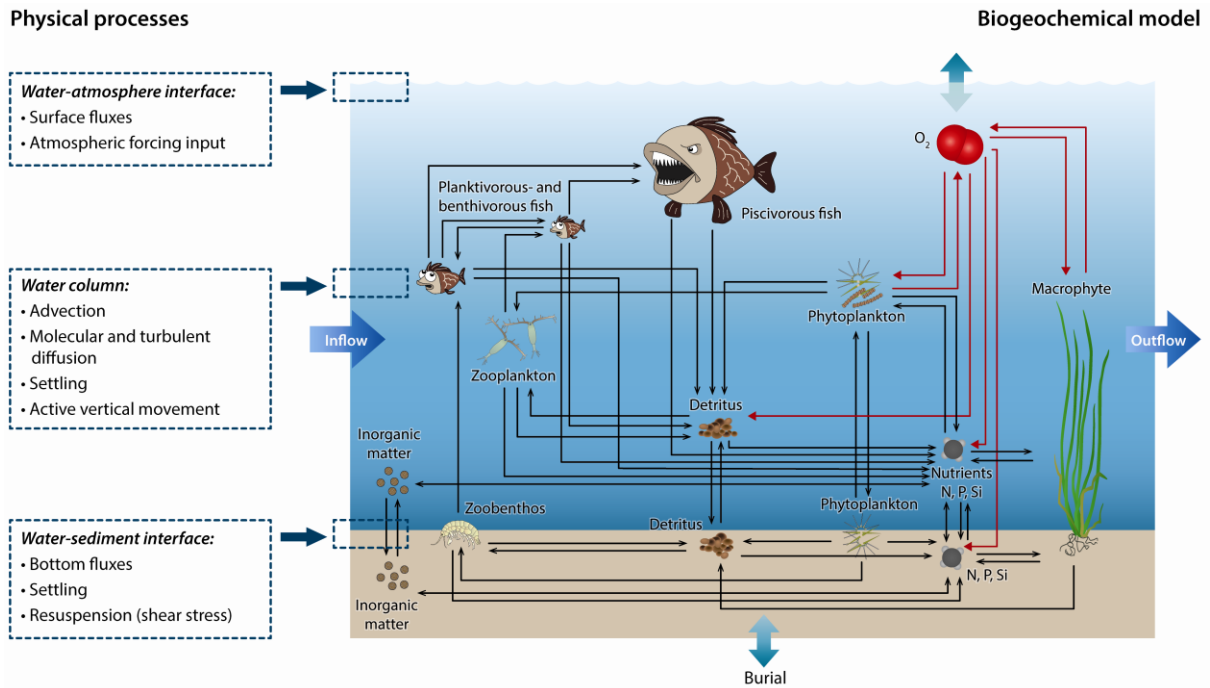

2

3

4 Fig. 1. Conceptual model of FABM-PCLake (FABM, Framework of Aquatic  
5 biogeochemical Models; PCLake, the implemented aquatic ecosystem model). Key  
6 state variables of the FABM-PCLake biogeochemical model and the interactions  
7 | between these (represented by arrows); and an illustration-indication of how a  
8 physical model may now transport biogeochemical state variables through explicit  
9 physical processes.

10

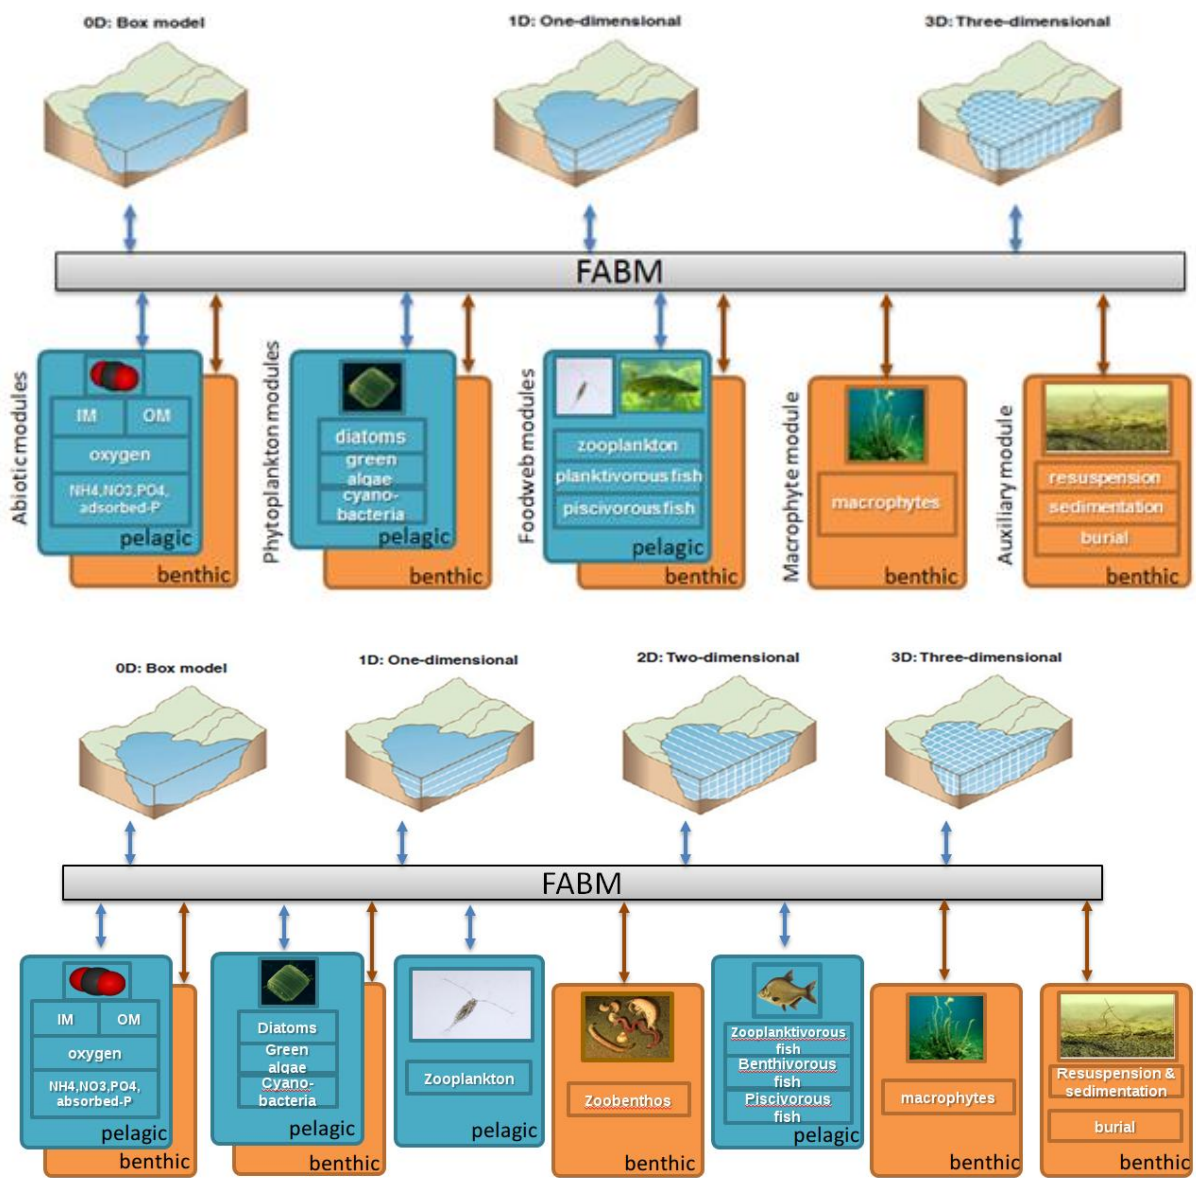

1

2

3 Fig. 2. The modular structure of the FABM-PCLake code. Each square box  
 4 represents a FORTRAN module of FABM-PCLake (and these modules are  
 5 interacting/communicating through FABM to simulate the processes illustrated by  
 6 arrows in Fig.1). The brown coloured boxes are related to the sediment domain and  
 7 the blue boxes to the water column domain. Note that all modules may be applied for  
 8 0-D to 3-D spatial domains. A detailed description of the contents of each module is  
 9 provided in the Supplementary Material.

10



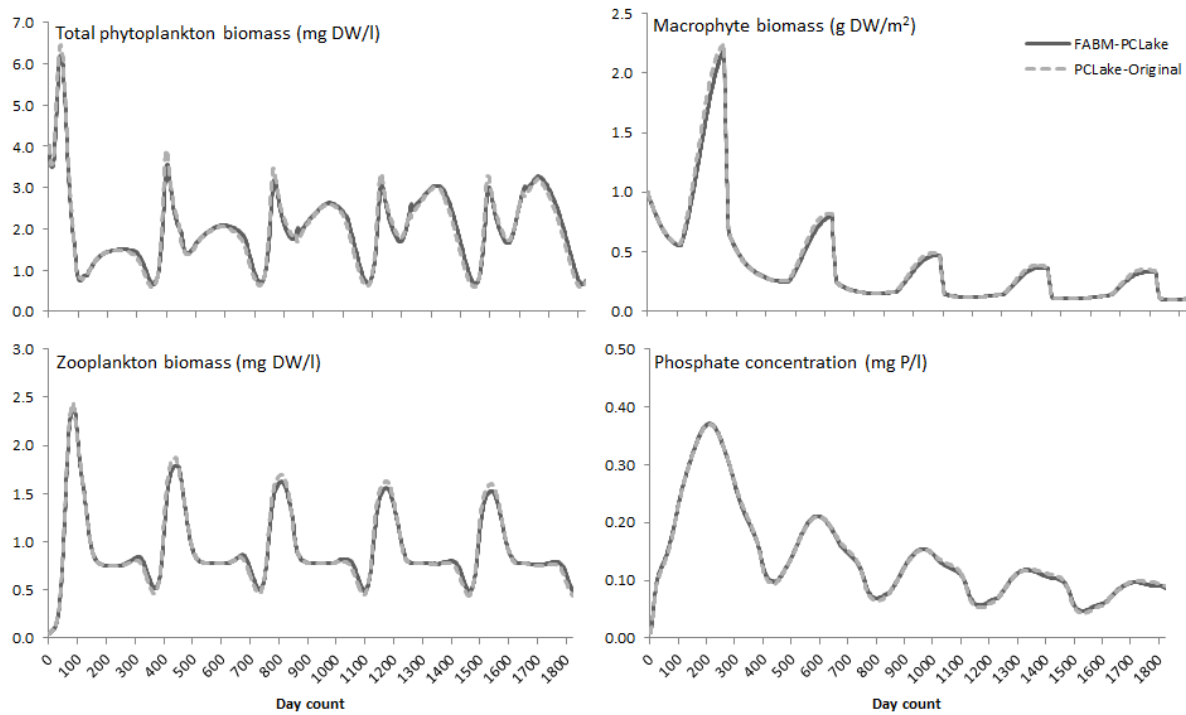

1

2 Fig. 3. Key time series outputs from a five-year simulation by the original PCLake  
 3 model (PCLake-Original), and the new FABM-PCLake model (FABM-PCLake),  
 4 represented by dry weight of total phytoplankton biomass, dry weight of zooplankton  
 5 biomass, dry weight of macrophytes biomass, and the concentration of phosphate in  
 6 the water column.

7

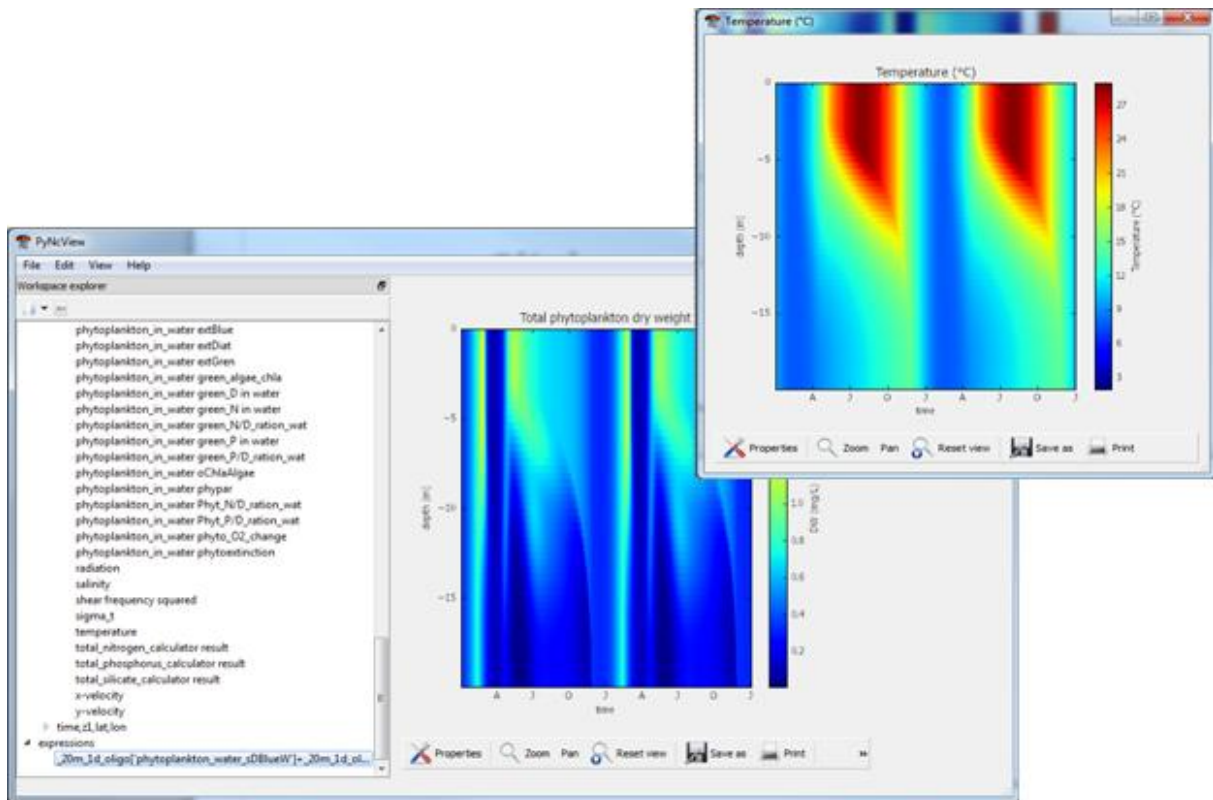

1  
 2 Fig. 4. Visualization of FABM-PCLake state variables in PyNcView, exemplified by a  
 3 ~~two-year~~two-year period simulated by a one-dimensional FABM-PCLake application  
 4 of a 20 m deep water column. State variables to be viewed are simply selected in the  
 5 left panel, and figures can be viewed, manipulated and saved in the right panel and  
 6 as detached figures (a detached figure is exemplified by the temperature plot).  
 7

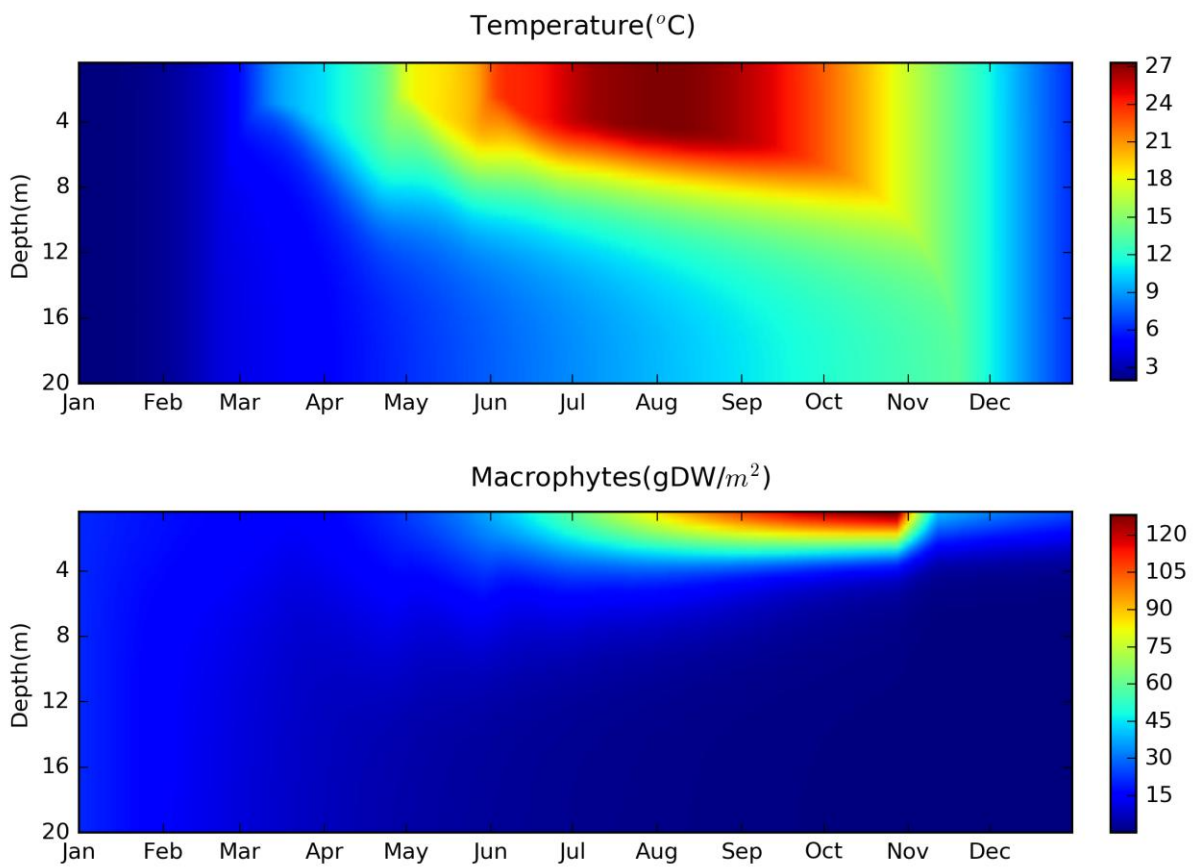

1  
2  
3  
4  
5

[Fig. 5. Example of a one year simulation of temperature and macrophyte profiles based on FABM-PCLake coupled to the 1D model GOTM \(with hypsography enabled, meaning that each water column layer interfaces with a certain sediment area\).](#)
